# Supplementary material for: Reaping the Potential of Wild Cajanus Species through Pre-Breeding for Improving Resistance to Pod Borer, Helicoverpa armigera, in Cultivated Pigeonpea (Cajanus cajan (L.) Millsp.)
Source: MDPI journal article supplement (doi:10.3390/biology11040485), 2022-03-22
Supplement: s1 [file s1]

**Supplementary Table S1.** List of introgression lines (ILs) selected from the evaluation of advanced backcross population, PP 1501, derived from *Cajanus acutifolius* for pod borer complex damage during the 2018 rainy season at ICRISAT, Patancheru, India.

| S. No. | Genotype identity | Damage rating | Recovery resistance score | Total no. of pods | Healthy pods (%) | Pod borer damage (%) | Pod fly damage (%) | Pod wasp damage (%) | Plume moth damage (%) | Total pod borer complex damage (%) |
|--------|-------------------|---------------|---------------------------|-------------------|------------------|----------------------|--------------------|---------------------|-----------------------|------------------------------------|
| 1      | PP1501-1-2-2      | -             | 6                         | 100               | 34               | 10                   | 37                 | 17                  | 2                     | 66                                 |
| 2      | PP1501-1-2-4      | 6             | 5                         | 100               | 48               | 25                   | 23                 | 4                   | 0                     | 52                                 |
| 3      | PP1501-1-5-2      | 7             | 6                         | 100               | 45               | 30                   | 14                 | 0                   | 11                    | 55                                 |
| 4      | PP1501-1-6-2      | 8             | 6                         | 100               | 56               | 21                   | 20                 | 0                   | 3                     | 44                                 |
| 5      | PP1501-1-8-2      | 7             | 6                         | 100               | 37               | 12                   | 35                 | 1                   | 15                    | 63                                 |
| 6      | PP1501-1-10-1     | 7             | 5                         | 100               | 58               | 20                   | 16                 | 0                   | 6                     | 42                                 |
| 7      | PP1501-1-10-4     | 7             | 5                         | 100               | 49               | 20                   | 30                 | 1                   | 0                     | 51                                 |
| 8      | PP1501-1-10-8     | 7             | 5                         | 100               | 54               | 15                   | 30                 | 1                   | 0                     | 46                                 |
| 9      | PP1501-1-12-3     | 8             | 5                         | 100               | 47               | 9                    | 38                 | 4                   | 2                     | 53                                 |
| 10     | PP1501-1-12-8     | 7             | 5                         | 100               | 25               | 30                   | 35                 | 0                   | 10                    | 75                                 |
| 11     | PP1501-1-13-2     | 7             | 5                         | 100               | 32               | 28                   | 26                 | 6                   | 8                     | 68                                 |
| 12     | PP1501-1-13-3     | 7             | 5                         | 100               | 28               | 32                   | 21                 | 11                  | 8                     | 72                                 |
| 13     | PP1501-1-13-4     | 7             | 5                         | 100               | 50               | 26                   | 23                 | 1                   | 0                     | 50                                 |
| 14     | PP1501-1-13-5     | 7             | 4                         | 100               | 65               | 23                   | 10                 | 2                   | 0                     | 35                                 |
| 15     | PP1501-1-18-4     | 8             | 6                         | 100               | 55               | 15                   | 30                 | 0                   | 0                     | 45                                 |
| 16     | PP1501-1-20-2     | 8             | 5                         | 100               | 30               | 32                   | 31                 | 4                   | 3                     | 70                                 |
| 17     | PP1501-1-20-6     | 7             | 5                         | 100               | 44               | 30                   | 17                 | 0                   | 9                     | 56                                 |
| 18     | PP1501-1-22-1     | 8             | 6                         | 100               | 36               | 14                   | 25                 | 20                  | 5                     | 64                                 |
| 19     | PP1501-1-22-2     | 8             | 5                         | 100               | 38               | 31                   | 26                 | 1                   | 4                     | 62                                 |
| 20     | PP1501-1-22-3     | 9             | 5                         | 100               | 34               | 34                   | 26                 | 5                   | 1                     | 66                                 |
| 21     | PP1501-1-22-4     | 8             | 5                         | 100               | 20               | 33                   | 34                 | 5                   | 8                     | 80                                 |
| 22     | PP1501-1-22-5     | 7             | 6                         | 100               | 32               | 34                   | 12                 | 8                   | 14                    | 68                                 |

|    |               |   |   |     |    |    |    |    |    |    |
|----|---------------|---|---|-----|----|----|----|----|----|----|
| 23 | PP1501-1-23-2 | 9 | 5 | 100 | 50 | 20 | 10 | 8  | 12 | 50 |
| 24 | PP1501-1-23-3 | 8 | 5 | 100 | 27 | 23 | 38 | 6  | 6  | 73 |
| 25 | PP1501-2-2-5  | 8 | 6 | 100 | 54 | 14 | 26 | 0  | 6  | 46 |
| 26 | PP1501-2-3-6  | 8 | 6 | 100 | 59 | 12 | 26 | 1  | 2  | 41 |
| 27 | PP1501-2-4-1  | 7 | 5 | 100 | 22 | 30 | 35 | 5  | 8  | 78 |
| 28 | PP1501-2-5-1  | 8 | 6 | 100 | 38 | 10 | 48 | 2  | 2  | 62 |
| 29 | PP1501-2-6-2  | 7 | 6 | 100 | 59 | 25 | 13 | 2  | 1  | 41 |
| 30 | PP1501-2-9-4  | 8 | 6 | 100 | 50 | 15 | 32 | 3  | 0  | 50 |
| 31 | PP1501-2-13-2 | 8 | 6 | 100 | 42 | 14 | 34 | 10 | 0  | 58 |
| 32 | PP1501-2-16-4 | 7 | 6 | 100 | 40 | 41 | 14 | 2  | 3  | 60 |
| 33 | PP1501-3-11-2 | 7 | 7 | 100 | 27 | 23 | 43 | 1  | 6  | 73 |
| 34 | PP1501-3-15-1 | 8 | 6 | 100 | 28 | 15 | 53 | 4  | 0  | 72 |
| 35 | PP1501-3-17-3 | 8 | 6 | 100 | 55 | 18 | 20 | 2  | 5  | 45 |
| 36 | PP1501-4-8-2  | 7 | 5 | 100 | 18 | 40 | 32 | 8  | 2  | 82 |
| 37 | PP1501-4-9-2  | 8 | 5 | 100 | 35 | 30 | 35 | 0  | 0  | 65 |
| 38 | PP1501-4-9-3  | 8 | 5 | 100 | 25 | 23 | 39 | 9  | 4  | 75 |
| 39 | PP1501-4-12-1 | 8 | 5 | 100 | 19 | 48 | 25 | 4  | 4  | 81 |
| 40 | PP1501-4-12-2 | 8 | 5 | 100 | 30 | 25 | 40 | 0  | 5  | 70 |
| 41 | PP1501-4-12-4 | 8 | 5 | 100 | 40 | 26 | 29 | 2  | 3  | 60 |
| 42 | PP1501-4-12-5 | - | 5 | 100 | 16 | 25 | 51 | 4  | 4  | 84 |
| 43 | PP1501-4-14-3 | 8 | 5 | 100 | 35 | 28 | 32 | 2  | 3  | 65 |
| 44 | PP1501-4-14-4 | 8 | 5 | 100 | 40 | 24 | 30 | 3  | 3  | 60 |
| 45 | PP1501-4-17-1 | 8 | 5 | 100 | 38 | 25 | 30 | 4  | 3  | 62 |
| 46 | PP1501-4-17-2 | 8 | 5 | 100 | 25 | 34 | 36 | 0  | 5  | 75 |
| 47 | PP1501-4-17-3 | 8 | 5 | 100 | 38 | 30 | 32 | 0  | 0  | 62 |
| 48 | PP1501-4-17-7 | 8 | 5 | 100 | 40 | 20 | 30 | 8  | 2  | 60 |
| 49 | PP1501-4-20-1 | 8 | 5 | 100 | 45 | 16 | 34 | 2  | 3  | 55 |
| 50 | PP1501-4-21-6 | 8 | 6 | 100 | 56 | 29 | 14 | 1  | 0  | 44 |
| 51 | PP1501-5-14-1 | 8 | 5 | 100 | 20 | 35 | 38 | 4  | 3  | 80 |

|    |                |   |   |     |    |    |    |    |    |    |
|----|----------------|---|---|-----|----|----|----|----|----|----|
| 52 | PP1501-5-14-3  | - | 5 | 100 | 28 | 21 | 45 | 3  | 5  | 74 |
| 53 | PP1501-5-14-4  | - | 5 | 100 | 15 | 20 | 55 | 5  | 5  | 85 |
| 54 | PP1501-5-15-3  | - | 5 | 100 | 23 | 32 | 38 | 2  | 5  | 77 |
| 55 | PP1501-5-15-7  | - | 6 | 100 | 37 | 15 | 44 | 0  | 4  | 63 |
| 56 | PP1501-6-12-2  | 8 | 5 | 100 | 18 | 27 | 49 | 4  | 2  | 82 |
| 57 | PP1501-7-19-5  | - | 5 | 100 | 54 | 20 | 23 | 0  | 3  | 46 |
| 58 | PP1501-9-9-2   | 8 | 5 | 100 | 35 | 25 | 35 | 3  | 2  | 65 |
| 59 | PP1501-9-18-1  | 8 | 6 | 100 | 20 | 30 | 3  | 2  | 55 | 35 |
| 60 | PP1501-10-17-1 | 8 | 6 | 100 | 50 | 31 | 13 | 1  | 5  | 50 |
| 61 | PP1501-10-17-2 | 8 | 6 | 100 | 49 | 34 | 13 | 2  | 2  | 51 |
| 62 | PP1501-12-1-1  | 7 | 4 | 100 | 25 | 38 | 25 | 4  | 8  | 75 |
| 63 | PP1501-12-1-2  | 8 | 4 | 100 | 57 | 21 | 14 | 2  | 6  | 43 |
| 64 | PP1501-12-1-3  | 8 | 5 | 100 | 35 | 25 | 30 | 8  | 2  | 65 |
| 65 | PP1501-12-1-4  | 7 | 5 | 100 | 52 | 16 | 24 | 2  | 6  | 48 |
| 66 | PP1501-12-1-5  | - | 5 | 100 | 30 | 25 | 30 | 5  | 10 | 70 |
| 67 | PP1501-12-1-6  | 8 | 5 | 100 | 40 | 33 | 23 | 2  | 2  | 60 |
| 68 | PP1501-12-1-7  | 8 | 5 | 100 | 40 | 24 | 34 | 0  | 2  | 60 |
| 69 | PP1501-14-1-5  | 8 | 5 | 100 | 57 | 14 | 24 | 1  | 4  | 43 |
| 70 | PP1501-14-2-1  | 7 | 6 | 100 | 45 | 15 | 38 | 0  | 2  | 55 |
| 71 | PP1501-14-2-3  | 8 | 5 | 100 | 45 | 20 | 30 | 1  | 4  | 55 |
| 72 | PP1501-14-4-3  | - | 6 | 100 | 48 | 7  | 35 | 5  | 5  | 52 |
| 73 | PP1501-14-5-3  | 7 | 5 | 100 | 50 | 20 | 25 | 2  | 3  | 50 |
| 74 | PP1501-14-7-7  | 8 | 6 | 100 | 61 | 22 | 15 | 0  | 2  | 39 |
| 75 | PP1501-16-6-5  | - | 5 | 100 | 35 | 25 | 35 | 2  | 3  | 65 |
| 76 | PP1501-16-7-2  | 8 | 6 | 100 | 62 | 7  | 24 | 3  | 4  | 38 |
| 77 | PP1501-16-7-6  | 8 | 6 | 100 | 67 | 7  | 22 | 1  | 3  | 33 |
| 78 | PP1501-16-7-7  | 7 | 5 | 100 | 40 | 20 | 28 | 10 | 2  | 60 |
| 79 | PP1501-20-6-2  | - | 5 | 100 | 42 | 33 | 22 | 1  | 2  | 58 |
| 80 | ICP 8863       | 8 | 6 | 100 | 40 | 16 | 38 | 0  | 10 | 65 |

|    |                    |   |   |     |    |    |    |   |   |    |
|----|--------------------|---|---|-----|----|----|----|---|---|----|
|    | (Recurrent parent) |   |   |     |    |    |    |   |   |    |
| 81 | ENT 11             | 7 | 6 | 100 | 29 | 29 | 30 | 5 | 7 | 71 |
| 82 | ICPL 332WR         | 6 | 5 | 100 | 38 | 20 | 34 | 4 | 3 | 62 |
| 83 | ICPL 87119         | 6 | 6 | 100 | 30 | 20 | 40 | 3 | 7 | 70 |
| 84 | ICPL 88039         | 8 | 8 | 100 | 39 | 33 | 22 | 5 | 1 | 61 |
| 85 | ICP 7035           | 7 | 6 | 100 | 41 | 25 | 27 | 3 | 4 | 59 |
| 86 | ICPL 85010         | 9 | 9 | 100 | 40 | 29 | 29 | 0 | 2 | 60 |
| 87 | ICPL 87            | 9 | 7 | 100 | 25 | 33 | 44 | 3 | 9 | 75 |

**Supplementary Table S2:** List of introgression lines selected from the evaluation of advanced backcross population, PP 1503, derived from the complex cross for pod borer complex damage during the 2018 rainy season at ICRISAT, Patancheru, India.

| S. No. | Genotype identity | Damage rating | Recovery resistance score | Total no. of pods | Healthy pods (%) | Pod borer damage (%) | Pod fly damage (%) | Pod wasp damage (%) | Plume moth damage (%) | Total pod borer complex damage (%) |
|--------|-------------------|---------------|---------------------------|-------------------|------------------|----------------------|--------------------|---------------------|-----------------------|------------------------------------|
| 1      | PP1503-3-1-3      | -             | 6                         | 100               | 51               | 11                   | 35                 | 2                   | 1                     | 49                                 |
| 2      | PP1503-5-2-4      | 8             | 5                         | 100               | 61               | 14                   | 14                 | 2                   | 9                     | 39                                 |
| 3      | PP1503-5-3-1      | 8             | 5                         | 100               | 47               | 20                   | 31                 | 0                   | 2                     | 53                                 |
| 4      | PP1503-5-3-3      | 8             | 6                         | 100               | 55               | 20                   | 24                 | 1                   | 0                     | 45                                 |
| 5      | PP1503-6-1-4      | 8             | 6                         | 100               | 61               | 21                   | 16                 | 0                   | 2                     | 39                                 |
| 6      | PP1503-6-2-5      | 7             | 5                         | 100               | 45               | 25                   | 25                 | 3                   | 2                     | 55                                 |
| 7      | PP1503-8-2-4      | 8             | 5                         | 100               | 45               | 25                   | 30                 | 0                   | 0                     | 55                                 |
| 8      | PP1503-8-3-2      | -             | 5                         | 100               | 25               | 25                   | 40                 | 8                   | 2                     | 75                                 |
| 9      | PP1503-10-5-4     | 7             | 6                         | 100               | 35               | 27                   | 38                 | 0                   | 0                     | 65                                 |
| 10     | PP1503-10-5-6     | -             | 6                         | 100               | 35               | 20                   | 35                 | 6                   | 4                     | 65                                 |
| 11     | PP1503-11-1-1     | 9             | 6                         | 100               | 53               | 6                    | 38                 | 1                   | 2                     | 47                                 |
| 12     | PP1503-11-1-4     | 7             | 6                         | 100               | 59               | 21                   | 20                 | 0                   | 0                     | 41                                 |
| 13     | PP1503-12-1-7     | 8             | 5                         | 100               | 40               | 28                   | 32                 | 0                   | 0                     | 60                                 |
| 14     | PP1503-12-2-2     | 7             | 5                         | 100               | 20               | 35                   | 36                 | 5                   | 4                     | 80                                 |
| 15     | PP1503-12-2-6     | 7             | 5                         | 100               | 35               | 33                   | 25                 | 4                   | 3                     | 65                                 |
| 16     | PP1503-14-2-7     | 8             | 5                         | 100               | 32               | 30                   | 35                 | 2                   | 1                     | 68                                 |
| 17     | PP1503-15-1-2     | -             | 5                         | 100               | 39               | 20                   | 33                 | 4                   | 4                     | 61                                 |
| 18     | PP1503-15-1-7     | -             | 5                         | 100               | 30               | 30                   | 35                 | 3                   | 2                     | 70                                 |
| 19     | PP1503-15-2-2     | -             | 5                         | 100               | 30               | 30                   | 35                 | 3                   | 2                     | 70                                 |
| 20     | PP1503-15-3-3     | 8             | 5                         | 100               | 38               | 30                   | 32                 | 0                   | 0                     | 62                                 |
| 21     | PP1503-15-3-4     | -             | 5                         | 100               | 41               | 22                   | 31                 | 3                   | 3                     | 59                                 |
| 22     | PP1503-16-3-8     | 8             | 5                         | 100               | 30               | 40                   | 20                 | 5                   | 5                     | 70                                 |

|    |                               |   |   |     |    |    |    |   |   |    |
|----|-------------------------------|---|---|-----|----|----|----|---|---|----|
| 23 | PP1503-18-1-7                 | 7 | 6 | 100 | 57 | 16 | 25 | 2 | 0 | 43 |
| 24 | PP1503-20-1-2                 | 8 | 5 | 100 | 38 | 20 | 30 | 8 | 4 | 62 |
| 25 | PP1503-20-1-5                 | 8 | 5 | 100 | 35 | 25 | 35 | 3 | 2 | 65 |
| 26 | PP1503-22-1-5                 | 8 | 6 | 100 | 45 | 40 | 12 | 1 | 2 | 55 |
| 27 | PP1503-20-1-7                 | 8 | 5 | 100 | 39 | 20 | 31 | 5 | 5 | 61 |
| 28 | PP1503-22-3-1                 | - | 6 | 100 | 56 | 18 | 23 | 3 | 0 | 44 |
| 29 | PP1503-22-3-3                 | 7 | 5 | 100 | 30 | 30 | 35 | 3 | 2 | 70 |
| 30 | PP1503-22-4-5                 | 8 | 5 | 100 | 30 | 30 | 35 | 5 | 0 | 70 |
| 31 | PP1503-25-4-4                 | 7 | 5 | 100 | 45 | 20 | 30 | 3 | 2 | 55 |
| 32 | PP1503-25-5-2                 | 8 | 5 | 100 | 45 | 25 | 28 | 2 | 0 | 55 |
| 33 | PP1503-25-5-6                 | 7 | 6 | 100 | 63 | 19 | 18 | 0 | 0 | 37 |
| 34 | PP1503-26-3-5                 | 6 | 5 | 100 | 30 | 35 | 28 | 4 | 3 | 70 |
| 35 | PP1503-27-2-8                 | - | 5 | 100 | 46 | 19 | 21 | 5 | 9 | 54 |
| 36 | PP1503-27-4-4                 | 6 | 5 | 100 | 20 | 30 | 40 | 5 | 5 | 80 |
| 37 | PP1503-28-1-3                 | 7 | 5 | 100 | 35 | 20 | 38 | 4 | 3 | 65 |
| 38 | PP1503-29-1-5                 | - | 6 | 100 | 60 | 30 | 10 | 0 | 0 | 40 |
| 39 | PP1503-29-2-1                 | 7 | 6 | 100 | 50 | 15 | 35 | 0 | 0 | 50 |
| 40 | PP1503-29-2-7                 | - | 5 | 100 | 44 | 28 | 20 | 0 | 8 | 56 |
| 41 | PP1503-30-1-6                 | 6 | 5 | 100 | 30 | 28 | 32 | 8 | 2 | 70 |
| 42 | ICPL 87119 (Recurrent parent) | 6 | 7 | 100 | 0  | 0  | 0  | 0 | 0 | 0  |
| 43 | ENT 11                        | 6 | 6 | 100 | 39 | 25 | 30 | 4 | 1 | 60 |
| 44 | ICPL 332WR                    | 6 | 5 | 100 | 33 | 26 | 36 | 3 | 1 | 67 |
| 45 | ICPL 87119                    | 6 | 6 | 100 | 25 | 30 | 41 | 2 | 2 | 75 |
| 46 | ICPL 88039                    | 7 | 7 | 100 | 27 | 27 | 41 | 4 | 1 | 72 |
| 47 | ICP 7035                      | 4 | 5 | 100 | 29 | 31 | 35 | 2 | 1 | 71 |
| 48 | ICPL 85010                    | 8 | 8 | 100 | 20 | 29 | 44 | 4 | 3 | 80 |
| 49 | ICPL 87                       | 9 | 8 | 100 | 24 | 30 | 42 | 3 | 2 | 77 |



**Supplementary Table S3.** List of introgression lines selected from the evaluation of advanced backcross population, PP 1504, derived from the complex cross for pod borer complex damage during the 2018 rainy season at ICRISAT, Patancheru, India.

| S. No. | Genotype identity           | Damage rating | Recovery resistance score | Total no. of pods | Healthy pods (%) | Pod borer damage (%) | Pod fly damage (%) | Pod wasp damage (%) | Plume moth damage (%) | Total pod borer complex damage (%) |
|--------|-----------------------------|---------------|---------------------------|-------------------|------------------|----------------------|--------------------|---------------------|-----------------------|------------------------------------|
| 1      | PP1504-1-3-1                | 7             | 5                         | 100               | 40               | 20                   | 29                 | 4                   | 7                     | 60                                 |
| 2      | PP1504-2-1-3                | 8             | 6                         | 100               | 46               | 17                   | 33                 | 2                   | 2                     | 54                                 |
| 3      | PP1504-2-2-1                | 8             | 5                         | 100               | 30               | 30                   | 30                 | 5                   | 5                     | 70                                 |
| 4      | PP1504-2-11-5               | 8             | 6                         | 100               | 50               | 22                   | 26                 | 1                   | 1                     | 50                                 |
| 5      | PP1504-3-7-2                | -             | 6                         | 100               | 45               | 20                   | 26                 | 5                   | 0                     | 51                                 |
| 6      | PP1504-4-8-2                | 8             | 6                         | 100               | 53               | 9                    | 37                 | 0                   | 1                     | 47                                 |
| 7      | PP1504-4-9-1                | -             | 6                         | 100               | 54               | 11                   | 35                 | 0                   | 0                     | 46                                 |
| 8      | PP1504-4-9-2                | -             | 6                         | 100               | 32               | 13                   | 35                 | 3                   | 1                     | 52                                 |
| 9      | ICP 8863 (Recurrent parent) | 7             | 6                         | 100               | 23               | 25                   | 39                 | 2                   | 1                     | 67                                 |
| 10     | ENT 11                      | 7             | 6                         | 100               | 20               | 36                   | 44                 | 0                   | 0                     | 67                                 |
| 11     | ICPL 332WR                  | 7             | 6                         | 100               | 35               | 25                   | 35                 | 3                   | 1                     | 65                                 |
| 12     | ICPL 87119                  | 7             | 6                         | 100               | 26               | 31                   | 39                 | 3                   | 1                     | 74                                 |
| 13     | ICPL 88039                  | 7             | 7                         | 100               | 20               | 25                   | 50                 | 3                   | 2                     | 80                                 |
| 14     | ICP 7035                    | 6             | 6                         | 100               | 27               | 29                   | 38                 | 4                   | 2                     | 73                                 |
| 15     | ICPL 85010                  | 9             | 9                         | 100               | -                | -                    | -                  | -                   | -                     | -                                  |
| 16     | ICPL 87                     | 8             | 9                         | 100               | 13               | 45                   | 40                 | 1                   | 1                     | 87                                 |



**Supplementary Table S4.** List of introgression lines selected from the evaluation of advanced backcross population, PP 1505, derived from *Cajanus scarabaeoides* for pod borer complex damage during the 2018 rainy season at ICRISAT, Patancheru, India.

| S. No | Genotype identity | Damage rating | Recovery resistance score | Total no. of pods | Healthy pods (%) | Pod borer damage (%) | Pod fly damage (%) | Pod wasp damage (%) | Plume moth damage (%) | Total pod borer complex damage (%) |
|-------|-------------------|---------------|---------------------------|-------------------|------------------|----------------------|--------------------|---------------------|-----------------------|------------------------------------|
| 1     | PP1505-4-4-1      | 8             | 5                         | 100               | 35               | 30                   | 30                 | 3                   | 2                     | 65                                 |
| 2     | PP1505-32-3-2     | 7             | 5                         | 100               | 48               | 24                   | 24                 | 2                   | 2                     | 52                                 |
| 3     | PP1505-32-5-3     | -             | 5                         | 100               | 35               | 30                   | 30                 | 3                   | 2                     | 65                                 |
| 4     | PP1505-59-4-1     | -             | 5                         | 100               | 40               | 20                   | 30                 | 5                   | 5                     | 60                                 |
| 5     | PP1505-59-4-3     | 7             | 5                         | 100               | 40               | 16                   | 35                 | 3                   | 6                     | 60                                 |
| 6     | PP1505-59-4-4     | 7             | 5                         | 100               | 58               | 10                   | 23                 | 3                   | 6                     | 42                                 |
| 7     | PP1505-59-4-6     | 7             | 5                         | 100               | 35               | 25                   | 30                 | 4                   | 6                     | 65                                 |
| 8     | PP1505-59-7-1     | 7             | 5                         | 100               | 39               | 25                   | 26                 | 5                   | 5                     | 61                                 |
| 9     | PP1505-59-7-2     | 7             | 5                         | 100               | 49               | 21                   | 18                 | 5                   | 7                     | 51                                 |
| 10    | PP1505-2-3-1      | 6             | 6                         | 100               | 60               | 25                   | 15                 | 0                   | 0                     | 40                                 |
| 11    | PP1505-2-8-1      | 8             | 6                         | 100               | 50               | 12                   | 36                 | 2                   | 0                     | 50                                 |
| 12    | PP1505-11-2-2     | 8             | 6                         | 100               | 57               | 28                   | 14                 | 0                   | 1                     | 43                                 |
| 13    | PP1505-11-2-4     | 7             | 6                         | 100               | 64               | 8                    | 26                 | 1                   | 1                     | 36                                 |
| 14    | PP1505-11-2-5     | -             | 6                         | 100               | 72               | 10                   | 18                 | 0                   | 0                     | 28                                 |
| 15    | PP1505-11-2-6     | -             | 6                         | 100               | 77               | 11                   | 7                  | 5                   | 0                     | 23                                 |
| 16    | PP1505-13-6-3     | 8             | 6                         | 100               | 64               | 18                   | 11                 | 7                   | 0                     | 36                                 |
| 17    | PP1505-20-5-2     | -             | 6                         | 100               | 56               | 16                   | 22                 | 5                   | 1                     | 44                                 |
| 18    | PP1505-28-6-1     | 8             | 6                         | 100               | 73               | 11                   | 15                 | 0                   | 1                     | 27                                 |
| 19    | PP1505-29-4-1     | 7             | 6                         | 100               | 55               | 20                   | 24                 | 1                   | 0                     | 45                                 |
| 20    | PP1505-31-1-2     | 8             | 6                         | 100               | 55               | 15                   | 28                 | 2                   | 0                     | 45                                 |
| 21    | PP1505-34-3-6     | 7             | 6                         | 100               | 62               | 5                    | 32                 | 1                   | 0                     | 38                                 |
| 22    | PP1505-36-4-1     | -             | 6                         | 100               | 56               | 15                   | 28                 | 1                   | 0                     | 44                                 |

|    |                                  |   |   |     |    |    |    |   |   |    |
|----|----------------------------------|---|---|-----|----|----|----|---|---|----|
| 23 | PP1505-36-4-2                    | - | 6 | 100 | 58 | 18 | 23 | 0 | 1 | 42 |
| 24 | PP1505-36-4-4                    | 7 | 6 | 100 | 54 | 12 | 28 | 2 | 4 | 46 |
| 25 | PP1505-61-4-1                    | 7 | 6 | 100 | 47 | 9  | 42 | 1 | 1 | 53 |
| 26 | PP1505-63-2-4                    | - | 6 | 100 | 61 | 7  | 30 | 2 | 0 | 39 |
| 27 | PP1505-63-2-5                    | - | 6 | 100 | 52 | 22 | 26 | 0 | 0 | 48 |
| 28 | PP1505-63-2-6                    | - | 6 | 100 | 22 | 12 | 57 | 6 | 3 | 78 |
| 29 | ICPL 87119<br>(Recurrent parent) | 7 | 6 | 100 | 37 | 25 | 37 | 1 | 2 | 63 |
| 30 | ENT 11                           | 7 | 6 | 100 | 43 | 22 | 31 | 2 | 3 | 58 |
| 31 | ICPL 332                         | 7 | 5 | 100 | 46 | 21 | 30 | 2 | 1 | 54 |
| 32 | ICPL 88039                       | 8 | 8 | 100 | 40 | 28 | 23 | 3 | 6 | 60 |
| 33 | ICP 7035                         | 6 | 6 | 100 | 38 | 35 | 26 | 0 | 1 | 62 |
| 34 | ICPL 85010                       | 9 | 8 | -   | -  | -  | -  | - | - | -  |
| 35 | ICPL 87                          | 9 | 8 | 100 | 20 | 35 | 33 | 5 | 7 | 80 |

**Supplementary Table S5.** Evaluation of selected introgression lines derived from wild *Cajanus* species for resistance to pod borer complex during the 2019 rainy season at ICRISAT, Patancheru, India.

| S. No. | Genotype identity | Damage rating | Recovery resistance score | Total no. of pods | Healthy pods (%) | Pod borer damage (%) | Pod fly damage (%) | Pod wasp damage (%) | Plume moth damage (%) | Total pod borer complex damage (%) | Number of larvae ( <i>H. armigera</i> ) at podding stage |
|--------|-------------------|---------------|---------------------------|-------------------|------------------|----------------------|--------------------|---------------------|-----------------------|------------------------------------|----------------------------------------------------------|
| 1      | PP 1501 -14-5-3   | 6.67          | 6.00                      | 100               | 38.33            | 21.67                | 39.00              | 0.00                | 1.00                  | 61.67                              | 1.22                                                     |
| 2      | PP1501-1-10-1     | 6.00          | 5.67                      | 100               | 47.33            | 21.67                | 29.00              | 0.00                | 2.00                  | 52.67                              | 1.0                                                      |
| 3      | PP1501-1-10-4     | 6.33          | 5.33                      | 100               | 49.00            | 23.00                | 23.00              | 0.67                | 4.33                  | 51.00                              | 1.22                                                     |
| 4      | PP1501-1-10-8     | 5.67          | 5.33                      | 100               | 50.00            | 19.33                | 28.67              | 0.33                | 1.67                  | 50.00                              | 0.11                                                     |
| 5      | PP1501-1-12-3     | 5.67          | 6.00                      | 100               | 36.67            | 22.67                | 37.00              | 0.00                | 3.67                  | 63.33                              | 1.67                                                     |
| 6      | PP1501-1-12-8     | 5.00          | 5.00                      | 100               | 36.33            | 20.67                | 38.67              | 0.00                | 4.33                  | 63.67                              | 1.22                                                     |
| 7      | PP1501-1-13-2     | 6.67          | 6.33                      | 100               | 60.00            | 22.67                | 14.67              | 0.33                | 2.33                  | 40.00                              | 0.89                                                     |
| 8      | PP1501-1-13-3     | 7.00          | 6.33                      | 100               | 44.33            | 17.67                | 37.33              | 0.33                | 0.33                  | 55.67                              | 1.33                                                     |
| 9      | PP1501-1-13-4     | 7.33          | 5.67                      | 100               | 58.33            | 18.67                | 21.33              | 0.00                | 1.67                  | 41.67                              | 1.0                                                      |
| 10     | PP1501-1-13-5     | 5.67          | 5.33                      | 100               | 59.67            | 22.00                | 15.33              | 0.33                | 2.67                  | 40.33                              | 0.78                                                     |
| 11     | PP1501-1-18-4     | 6.33          | 6.33                      | 100               | 54.33            | 21.33                | 22.00              | 0.00                | 2.33                  | 45.67                              | 1.22                                                     |
| 12     | PP1501-1-2-2      | 6.67          | 6.67                      | 100               | 37.00            | 19.67                | 40.00              | 1.33                | 2.00                  | 63.00                              | 1.44                                                     |
| 13     | PP1501-1-2-4      | 5.00          | 6.00                      | 100               | 38.67            | 18.67                | 41.33              | 0.33                | 1.00                  | 61.33                              | 1.33                                                     |
| 14     | PP1501-1-20-2     | 6.33          | 6.67                      | 100               | 36.00            | 20.67                | 39.33              | 0.33                | 3.67                  | 64.00                              | 1.33                                                     |
| 15     | PP1501-1-20-6     | 6.67          | 6.33                      | 100               | 58.33            | 21.00                | 19.00              | 0.00                | 1.67                  | 41.67                              | 1.22                                                     |
| 16     | PP1501-1-22-1     | 7.00          | 7.33                      | 100               | 52.67            | 23.33                | 22.00              | 0.33                | 1.67                  | 47.33                              | 1.08                                                     |
| 17     | PP1501-1-22-2     | 6.67          | 6.00                      | 100               | 54.67            | 21.00                | 22.67              | 0.33                | 1.33                  | 45.33                              | 1.33                                                     |
| 18     | PP1501-1-22-3     | 6.67          | 7.00                      | 100               | 67.00            | 21.33                | 9.33               | 0.00                | 2.33                  | 33.00                              | 0.89                                                     |
| 19     | PP1501-1-22-4     | 6.33          | 6.33                      | 100               | 57.33            | 21.33                | 15.67              | 0.67                | 5.00                  | 42.67                              | 1.67                                                     |
| 20     | PP1501-1-22-5     | 5.67          | 5.67                      | 100               | 55.33            | 19.67                | 23.00              | 1.33                | 0.67                  | 44.67                              | 1.67                                                     |

|    |                |      |      |     |       |       |       |      |      |       |      |
|----|----------------|------|------|-----|-------|-------|-------|------|------|-------|------|
| 21 | PP1501-1-23-2  | 5.67 | 5.00 | 100 | 60.00 | 22.67 | 14.67 | 0.00 | 2.67 | 40.00 | 0.78 |
| 22 | PP1501-1-23-3  | 5.67 | 5.67 | 100 | 60.33 | 20.67 | 16.67 | 0.00 | 2.33 | 39.67 | 0.56 |
| 23 | PP1501-1-5-2   | 6.67 | 6.33 | 100 | 47.00 | 20.33 | 30.00 | 0.67 | 2.00 | 53.00 | 1.33 |
| 24 | PP1501-1-6-2   | 6.00 | 6.00 | 100 | 55.33 | 22.00 | 21.33 | 0.00 | 1.33 | 44.67 | 0.89 |
| 25 | PP1501-1-8-2   | 6.00 | 6.00 | 100 | 55.00 | 18.00 | 26.50 | 0.00 | 0.50 | 45.00 | 1.78 |
| 26 | PP1501-10-17-1 | 7.00 | 7.00 | 100 | 49.33 | 20.67 | 26.33 | 0.00 | 3.67 | 50.67 | 1.11 |
| 27 | PP1501-10-17-2 | 5.67 | 6.00 | 100 | 58.00 | 18.67 | 22.00 | 0.00 | 1.33 | 42.00 | 0.67 |
| 28 | PP1501-12-1-1  | 5.67 | 5.67 | 100 | 42.67 | 20.33 | 35.33 | 0.00 | 1.67 | 57.33 | 1.56 |
| 29 | PP1501-12-1-2  | 5.33 | 5.67 | 100 | 48.67 | 20.00 | 30.33 | 0.00 | 1.00 | 51.33 | 0.11 |
| 30 | PP1501-12-1-3  | 6.33 | 5.67 | 100 | 54.00 | 19.33 | 26.00 | 0.00 | 0.67 | 46.00 | 1.33 |
| 31 | PP1501-12-1-4  | 6.00 | 6.33 | 100 | 47.00 | 19.00 | 31.67 | 0.33 | 2.00 | 53.00 | 1.66 |
| 32 | PP1501-12-1-5  | 6.00 | 5.67 | 100 | 59.33 | 18.33 | 21.00 | 0.33 | 1.00 | 40.67 | 1.0  |
| 33 | PP1501-12-1-6  | 5.33 | 5.00 | 100 | 58.33 | 20.67 | 20.33 | 0.00 | 0.67 | 41.67 | 0.44 |
| 34 | PP1501-12-1-7  | 6.33 | 5.67 | 100 | 48.67 | 20.33 | 29.33 | 0.00 | 1.67 | 51.33 | 1.22 |
| 35 | PP1501-14-1-5  | 6.00 | 5.33 | 100 | 52.00 | 18.67 | 23.33 | 0.00 | 6.00 | 48.00 | 0.67 |
| 36 | PP1501-14-2-1  | 6.00 | 5.67 | 100 | 31.00 | 23.67 | 41.00 | 0.00 | 4.33 | 69.00 | 1.22 |
| 37 | PP1501-14-2-3  | 6.67 | 6.33 | 100 | 42.00 | 21.00 | 34.67 | 0.33 | 2.00 | 58.00 | 1.11 |
| 38 | PP1501-14-4-3  | 5.33 | 6.00 | 100 | 40.33 | 22.67 | 33.67 | 0.67 | 2.67 | 59.67 | 1.56 |
| 39 | PP1501-14-7-7  | 5.67 | 5.33 | 100 | 56.33 | 19.67 | 21.67 | 0.00 | 2.33 | 43.67 | 0.67 |
| 40 | PP1501-16-6-5  | 6.00 | 6.00 | 100 | 43.67 | 22.33 | 32.00 | 0.00 | 2.00 | 56.33 | 1.22 |
| 41 | PP1501-16-7-2  | 6.00 | 5.33 | 100 | 53.33 | 22.00 | 21.00 | 0.00 | 3.67 | 46.67 | 0.22 |
| 42 | PP1501-16-7-6  | 6.33 | 6.00 | 100 | 42.33 | 19.00 | 36.00 | 1.00 | 1.67 | 57.67 | 1.08 |
| 43 | PP1501-16-7-7  | 6.33 | 5.00 | 100 | 51.33 | 24.00 | 18.67 | 0.33 | 5.67 | 48.67 | 1.67 |
| 44 | PP1501-2-13-2  | 7.00 | 6.67 | 100 | 45.00 | 19.67 | 33.33 | 1.00 | 1.00 | 55.00 | 1.67 |
| 45 | PP1501-2-16-4  | 6.33 | 6.33 | 100 | 59.00 | 19.33 | 19.00 | 0.00 | 2.67 | 41.00 | 0.99 |
| 46 | PP1501-2-2-5   | 6.33 | 7.00 | 100 | 37.67 | 21.33 | 39.67 | 0.00 | 1.33 | 62.33 | 1.11 |
| 47 | PP1501-2-3-6   | 5.67 | 6.33 | 100 | 67.67 | 18.00 | 12.33 | 0.33 | 1.67 | 32.33 | 0.33 |
| 48 | PP1501-2-4-1   | 6.33 | 6.33 | 100 | 51.33 | 20.00 | 27.00 | 0.33 | 1.33 | 48.67 | 1.33 |
| 49 | PP1501-2-5-1   | 6.67 | 6.33 | 100 | 48.33 | 18.33 | 31.00 | 0.00 | 2.33 | 51.67 | 1.66 |

|    |               |      |      |     |       |       |       |      |      |       |      |
|----|---------------|------|------|-----|-------|-------|-------|------|------|-------|------|
| 50 | PP1501-2-6-2  | 5.67 | 6.00 | 100 | 32.33 | 24.00 | 36.33 | 0.33 | 7.00 | 67.67 | 1.22 |
| 51 | PP1501-2-9-4  | 6.33 | 6.67 | 100 | 59.33 | 19.67 | 15.33 | 0.00 | 5.67 | 40.67 | 0.89 |
| 52 | PP1501-20-6-2 | 6.00 | 5.67 | 100 | 49.67 | 20.00 | 26.33 | 0.00 | 4.00 | 50.33 | 0.62 |
| 53 | PP1501-3-11-2 | 6.00 | 6.00 | 100 | 63.00 | 20.33 | 14.67 | 0.00 | 2.00 | 37.00 | 1.33 |
| 54 | PP1501-3-15-1 | 7.00 | 6.33 | 100 | 39.67 | 18.67 | 38.67 | 0.33 | 2.67 | 60.33 | 1.19 |
| 55 | PP1501-3-17-3 | 6.33 | 6.33 | 100 | 66.67 | 20.00 | 11.33 | 0.33 | 1.67 | 33.33 | 0.67 |
| 56 | PP1501-4-12-1 | 6.33 | 5.67 | 100 | 56.33 | 18.00 | 25.33 | 0.00 | 0.33 | 43.67 | 1.22 |
| 57 | PP1501-4-12-2 | 6.33 | 6.33 | 100 | 60.67 | 17.67 | 19.00 | 0.67 | 2.00 | 39.33 | 2.0  |
| 58 | PP1501-4-12-4 | 6.33 | 5.67 | 100 | 53.33 | 22.33 | 21.33 | 0.33 | 2.67 | 46.67 | 1.33 |
| 59 | PP1501-4-12-5 | 6.33 | 5.67 | 100 | 61.67 | 18.00 | 19.33 | 0.00 | 1.00 | 38.33 | 1.08 |
| 60 | PP1501-4-14-3 | 6.33 | 5.67 | 100 | 42.67 | 22.67 | 31.67 | 0.33 | 2.67 | 57.33 | 1.33 |
| 61 | PP1501-4-14-4 | 6.33 | 6.67 | 100 | 41.33 | 20.33 | 36.00 | 0.00 | 2.33 | 58.67 | 1.33 |
| 62 | PP1501-4-17-1 | 5.67 | 6.00 | 100 | 58.67 | 21.67 | 15.67 | 0.00 | 4.00 | 41.33 | 2.0  |
| 63 | PP1501-4-17-2 | 7.00 | 6.67 | 100 | 58.67 | 19.33 | 21.00 | 0.33 | 0.67 | 41.33 | 1.0  |
| 64 | PP1501-4-17-3 | 6.33 | 6.00 | 100 | 62.33 | 19.33 | 17.33 | 0.00 | 1.00 | 37.67 | 0.33 |
| 65 | PP1501-4-17-7 | 6.67 | 6.67 | 100 | 53.33 | 18.00 | 27.67 | 0.33 | 0.67 | 46.67 | 0.11 |
| 66 | PP1501-4-20-1 | 7.00 | 6.67 | 100 | 56.33 | 16.67 | 23.67 | 2.00 | 1.33 | 43.67 | 1.33 |
| 67 | PP1501-4-21-6 | 6.67 | 6.33 | 100 | 52.67 | 20.00 | 24.67 | 0.00 | 2.67 | 47.33 | 0.89 |
| 68 | PP1501-4-8-2  | 7.00 | 6.33 | 100 | 42.00 | 18.67 | 38.00 | 1.00 | 0.33 | 58.00 | 1.56 |
| 69 | PP1501-4-9-2  | 7.00 | 6.67 | 100 | 49.33 | 19.00 | 28.67 | 0.33 | 2.67 | 50.67 | 1.44 |
| 70 | PP1501-4-9-3  | 7.00 | 6.67 | 100 | 46.50 | 21.00 | 29.50 | 0.00 | 3.00 | 53.50 | 1.22 |
| 71 | PP1501-5-14-1 | 6.67 | 5.67 | 100 | 36.67 | 19.33 | 41.33 | 0.33 | 2.33 | 63.33 | 1.33 |
| 72 | PP1501-5-14-3 | 6.33 | 5.67 | 100 | 53.33 | 21.00 | 23.33 | 0.00 | 2.33 | 46.67 | 0.11 |
| 73 | PP1501-5-14-4 | 5.33 | 5.33 | 100 | 46.33 | 20.33 | 32.33 | 0.00 | 1.00 | 53.67 | 0.99 |
| 74 | PP1501-5-15-3 | 6.67 | 6.33 | 100 | 48.67 | 19.67 | 28.33 | 0.00 | 3.33 | 51.33 | 1.11 |
| 75 | PP1501-5-15-7 | 6.00 | 6.00 | 100 | 48.33 | 21.33 | 27.00 | 0.00 | 3.33 | 51.67 | 1.08 |
| 76 | PP1501-6-12-2 | 6.33 | 5.00 | 100 | 45.50 | 20.00 | 32.50 | 0.50 | 1.50 | 54.50 | 0.99 |
| 77 | PP1501-7-19-5 | 6.67 | 6.33 | 100 | 46.00 | 23.67 | 28.67 | 0.67 | 1.00 | 54.00 | 1.22 |
| 78 | PP1501-9-18-1 | 6.67 | 6.67 | 100 | 41.67 | 19.67 | 37.33 | 0.67 | 0.67 | 58.33 | 1.22 |

|     |               |      |      |     |       |       |       |      |      |       |      |
|-----|---------------|------|------|-----|-------|-------|-------|------|------|-------|------|
| 79  | PP1501-9-9-2  | 6.33 | 5.67 | 100 | 42.00 | 21.00 | 34.67 | 0.33 | 2.00 | 58.00 | 1.11 |
| 80  | PP1503-10-5-4 | 5.67 | 5.67 | 100 | 40.67 | 24.67 | 31.00 | 1.33 | 2.33 | 59.33 | 1.0  |
| 81  | PP1503-10-5-6 | 6.67 | 6.00 | 100 | 47.67 | 20.33 | 28.00 | 0.00 | 4.00 | 52.33 | 1.08 |
| 82  | PP1503-11-1-1 | 6.33 | 6.00 | 100 | 30.33 | 21.67 | 47.00 | 0.00 | 1.00 | 69.67 | 1.08 |
| 83  | PP1503-11-1-4 | 5.67 | 7.00 | 100 | 41.00 | 17.33 | 40.33 | 0.33 | 1.00 | 59.00 | 0.99 |
| 84  | PP1503-12-1-7 | 5.33 | 6.00 | 100 | 42.67 | 20.33 | 31.33 | 0.00 | 5.67 | 57.33 | 1.33 |
| 85  | PP1503-12-2-2 | 6.00 | 6.00 | 100 | 40.67 | 22.33 | 33.00 | 1.00 | 3.00 | 59.33 | 1.08 |
| 86  | PP1503-12-2-6 | 7.00 | 6.33 | 100 | 51.67 | 20.67 | 22.33 | 0.67 | 4.67 | 48.33 | 1.22 |
| 87  | PP1503-14-2-7 | 6.33 | 6.00 | 100 | 41.67 | 20.67 | 33.00 | 0.00 | 4.67 | 58.33 | 1.33 |
| 88  | PP1503-15-1-2 | 6.33 | 5.33 | 100 | 52.67 | 20.00 | 25.67 | 0.00 | 1.67 | 47.33 | 1.2  |
| 89  | PP1503-15-1-7 | 5.67 | 6.33 | 100 | 39.67 | 22.67 | 35.67 | 0.33 | 1.67 | 60.33 | 1.22 |
| 90  | PP1503-15-2-2 | 6.00 | 6.33 | 100 | 59.67 | 19.00 | 21.00 | 0.33 | 0.00 | 40.33 | 1.33 |
| 91  | PP1503-15-3-3 | 5.67 | 5.67 | 100 | 50.33 | 21.33 | 26.67 | 0.33 | 1.33 | 49.67 | 1.44 |
| 92  | PP1503-15-3-4 | 6.00 | 5.67 | 100 | 49.00 | 18.67 | 31.67 | 0.00 | 0.67 | 51.00 | 1.22 |
| 93  | PP1503-16-3-8 | 6.00 | 6.33 | 100 | 54.33 | 19.67 | 23.00 | 0.33 | 2.67 | 45.67 | 0.11 |
| 94  | PP1503-18-1-7 | 6.00 | 6.33 | 100 | 32.00 | 22.67 | 43.67 | 0.33 | 1.33 | 68.00 | 1.11 |
| 95  | PP1503-20-1-2 | 6.00 | 5.67 | 100 | 50.00 | 18.00 | 29.33 | 0.00 | 2.67 | 50.00 | 1.80 |
| 96  | PP1503-20-1-5 | 5.33 | 6.00 | 100 | 51.67 | 25.00 | 19.67 | 0.33 | 3.33 | 48.33 | 1.0  |
| 97  | PP1503-20-1-7 | 5.00 | 5.33 | 100 | 55.67 | 22.33 | 18.33 | 0.00 | 3.67 | 44.33 | 0.89 |
| 98  | PP1503-22-1-5 | 6.00 | 6.00 | 100 | 43.00 | 22.00 | 30.33 | 1.00 | 3.67 | 57.00 | 1.0  |
| 99  | PP1503-22-3-1 | 5.33 | 6.33 | 100 | 40.33 | 18.00 | 40.67 | 0.33 | 0.67 | 59.67 | 1.22 |
| 100 | PP1503-22-3-3 | 5.67 | 6.00 | 100 | 47.67 | 20.00 | 29.67 | 0.00 | 2.67 | 52.33 | 1.56 |
| 101 | PP1503-22-4-5 | 5.67 | 5.67 | 100 | 62.67 | 19.33 | 16.00 | 0.00 | 2.00 | 37.33 | 1.33 |
| 102 | PP1503-25-4-4 | 6.33 | 6.00 | 100 | 41.33 | 22.33 | 36.00 | 0.00 | 0.33 | 58.67 | 1.22 |
| 103 | PP1503-25-5-2 | 6.00 | 5.67 | 100 | 58.67 | 23.00 | 16.00 | 0.00 | 2.33 | 41.33 | 1.33 |
| 104 | PP1503-25-5-6 | 6.33 | 6.33 | 100 | 31.33 | 22.67 | 44.33 | 0.00 | 1.67 | 68.67 | 1.0  |
| 105 | PP1503-26-3-5 | 6.67 | 6.33 | 100 | 51.67 | 22.67 | 22.00 | 0.00 | 3.67 | 48.33 | 1.67 |
| 106 | PP1503-27-2-8 | 5.67 | 6.00 | 100 | 52.00 | 21.00 | 25.00 | 0.33 | 1.67 | 48.00 | 1.08 |
| 107 | PP1503-27-4-4 | 6.33 | 6.00 | 100 | 49.33 | 20.33 | 26.67 | 0.33 | 3.33 | 50.67 | 1.0  |

|     |               |      |      |     |       |       |       |      |      |       |      |
|-----|---------------|------|------|-----|-------|-------|-------|------|------|-------|------|
| 108 | PP1503-28-1-3 | 6.67 | 6.00 | 100 | 45.67 | 22.00 | 31.00 | 0.00 | 1.33 | 54.33 | 1.0  |
| 109 | PP1503-29-1-5 | 6.00 | 6.00 | 100 | 46.67 | 18.33 | 33.33 | 0.33 | 1.33 | 53.33 | 1.08 |
| 110 | PP1503-29-2-1 | 6.00 | 6.67 | 100 | 21.67 | 24.33 | 50.67 | 0.00 | 3.33 | 78.33 | 0.92 |
| 111 | PP1503-29-2-7 | 6.67 | 6.00 | 100 | 44.00 | 22.00 | 30.33 | 0.00 | 3.67 | 56.00 | 0.11 |
| 112 | PP1503-3-1-3  | 6.33 | 7.00 | 100 | 47.00 | 21.67 | 28.67 | 0.00 | 2.67 | 53.00 | 1.44 |
| 113 | PP1503-30-1-6 | 6.00 | 6.00 | 100 | 56.33 | 19.33 | 23.00 | 0.00 | 1.33 | 43.67 | 1.56 |
| 114 | PP1503-5-2-4  | 6.33 | 5.67 | 100 | 43.67 | 20.67 | 32.00 | 0.00 | 3.67 | 56.33 | 1.0  |
| 115 | PP1503-5-3-1  | 6.00 | 6.00 | 100 | 59.67 | 19.33 | 19.00 | 0.00 | 2.00 | 40.33 | 1.08 |
| 116 | PP1503-5-3-3  | 5.67 | 6.00 | 100 | 63.00 | 23.33 | 10.33 | 0.33 | 3.00 | 37.00 | 0.56 |
| 117 | PP1503-6-1-4  | 5.67 | 5.33 | 100 | 58.33 | 18.67 | 23.00 | 0.00 | 0.00 | 41.67 | 0.89 |
| 118 | PP1503-6-2-5  | 6.00 | 5.33 | 100 | 43.33 | 24.67 | 25.67 | 0.67 | 5.67 | 56.67 | 1.33 |
| 119 | PP1503-8-2-4  | 6.00 | 5.33 | 100 | 57.67 | 25.33 | 9.33  | 0.33 | 7.33 | 42.33 | 0.11 |
| 120 | PP1503-8-3-2  | 6.00 | 6.67 | 100 | 42.33 | 22.00 | 32.33 | 0.33 | 3.00 | 57.67 | 0.77 |
| 121 | PP1504-1-3-1  | 5.67 | 5.33 | 100 | 39.00 | 22.00 | 35.33 | 0.33 | 3.33 | 61.00 | 1.44 |
| 122 | PP1504-2-1-3  | 6.33 | 7.00 | 100 | 36.67 | 19.33 | 40.67 | 0.00 | 3.33 | 63.33 | 1.17 |
| 123 | PP1504-2-11-5 | 6.33 | 7.00 | 100 | 31.33 | 19.00 | 48.33 | 0.67 | 0.67 | 68.67 | 1.08 |
| 124 | PP1504-2-2-1  | 5.67 | 5.67 | 100 | 44.67 | 23.67 | 27.33 | 0.00 | 4.33 | 55.33 | 1.22 |
| 125 | PP1504-3-7-2  | 7.33 | 7.33 | 100 | 34.67 | 19.33 | 42.33 | 0.67 | 3.00 | 65.33 | 1.33 |
| 126 | PP1504-4-8-2  | 6.67 | 7.00 | 100 | 23.00 | 25.67 | 47.33 | 0.33 | 3.67 | 77.00 | 1.56 |
| 127 | PP1504-4-9-1  | 6.00 | 6.67 | 100 | 38.67 | 21.33 | 39.33 | 0.00 | 0.67 | 61.33 | 1.44 |
| 128 | PP1504-4-9-2  | 5.67 | 6.67 | 100 | 26.33 | 19.67 | 53.33 | 0.33 | 0.33 | 73.67 | 1.11 |
| 129 | PP1505-11-2-2 | 6.33 | 5.67 | 100 | 49.67 | 24.33 | 23.00 | 0.33 | 2.67 | 50.33 | 1.08 |
| 130 | PP1505-11-2-4 | 6.67 | 6.00 | 100 | 42.67 | 19.00 | 37.00 | 0.33 | 1.00 | 57.33 | 1.0  |
| 131 | PP1505-11-2-5 | 7.00 | 6.00 | 100 | 55.33 | 21.67 | 20.33 | 0.33 | 2.33 | 44.67 | 0.67 |
| 132 | PP1505-11-2-6 | 6.33 | 5.33 | 100 | 35.67 | 18.00 | 42.33 | 2.67 | 1.33 | 64.33 | 0.33 |
| 133 | PP1505-13-6-3 | 6.67 | 5.67 | 100 | 63.50 | 19.00 | 16.00 | 1.00 | 0.50 | 36.50 | 1.08 |
| 134 | PP1505-2-3-1  | 6.67 | 5.33 | 100 | 29.33 | 23.67 | 46.33 | 0.00 | 0.67 | 70.67 | 1.22 |
| 135 | PP1505-2-8-1  | 6.67 | 5.00 | 100 | 49.33 | 22.33 | 21.67 | 2.00 | 4.67 | 50.67 | 0.78 |
| 136 | PP1505-20-5-2 | 6.67 | 6.33 | 100 | 58.00 | 16.67 | 23.00 | 2.00 | 0.33 | 42.00 | 1.08 |

|     |               |        |        |     |        |       |        |       |       |        |        |
|-----|---------------|--------|--------|-----|--------|-------|--------|-------|-------|--------|--------|
| 137 | PP1505-28-6-1 | 6.33   | 5.33   | 100 | 42.67  | 23.67 | 31.67  | 0.00  | 2.00  | 57.33  | 0.11   |
| 138 | PP1505-29-4-1 | 5.67   | 6.00   | 100 | 28.67  | 24.67 | 44.67  | 0.00  | 2.00  | 71.33  | 1.0    |
| 139 | PP1505-31-1-2 | 7.00   | 8.00   | -   | -      | -     | -      | -     | -     | -      | -      |
| 140 | PP1505-32-3-2 | 6.33   | 5.67   | 100 | 41.33  | 19.33 | 38.33  | 0.00  | 1.00  | 58.67  | 1.08   |
| 141 | PP1505-32-5-3 | 7.00   | 6.67   | 100 | 64.33  | 17.67 | 15.00  | 0.67  | 2.33  | 35.67  | 1.44   |
| 142 | PP1505-34-3-6 | 6.33   | 5.67   | 100 | 55.33  | 19.67 | 22.33  | 0.00  | 2.67  | 44.67  | 0.44   |
| 143 | PP1505-63-2-6 | 6.00   | 6.67   | 100 | 33.67  | 21.67 | 41.33  | 2.33  | 1.00  | 66.33  | 1.33   |
| 144 | PP1505-36-4-1 | 6.67   | 4.67   | 100 | 45.67  | 20.67 | 31.67  | 1.33  | 0.67  | 54.33  | 0.67   |
| 145 | PP1505-36-4-2 | 7.00   | 5.33   | 100 | 42.33  | 20.33 | 33.00  | 2.00  | 2.33  | 57.67  | 0.78   |
| 146 | PP1505-36-4-4 | 6.67   | 6.00   | 100 | 46.67  | 22.67 | 27.67  | 0.33  | 2.67  | 53.33  | 0.89   |
| 147 | PP1505-4-4-1  | 6.33   | 5.67   | 100 | 45.33  | 23.67 | 28.00  | 0.00  | 3.00  | 54.67  | 1.33   |
| 148 | PP1505-59-4-1 | 6.33   | 5.67   | 100 | 47.00  | 19.00 | 31.00  | 0.33  | 2.67  | 53.00  | 0.99   |
| 149 | PP1505-59-4-3 | 6.00   | 6.00   | 100 | 43.33  | 21.67 | 32.67  | 0.00  | 2.33  | 56.67  | 1.22   |
| 150 | PP1505-59-4-4 | 6.33   | 6.33   | 100 | 44.67  | 21.67 | 31.00  | 0.00  | 2.67  | 55.33  | 0.89   |
| 151 | PP1505-59-4-6 | 6.67   | 5.00   | 100 | 42.67  | 26.67 | 22.33  | 1.00  | 7.33  | 57.33  | 1.44   |
| 152 | PP1505-59-7-1 | 7.00   | 6.00   | 100 | 27.67  | 22.00 | 46.67  | 1.00  | 2.67  | 72.33  | 1.89   |
| 153 | PP1505-59-7-2 | 6.00   | 6.33   | 100 | 47.00  | 23.67 | 24.67  | 0.67  | 4.00  | 53.00  | 1.11   |
| 154 | PP1505-61-4-1 | 6.67   | 7.00   | 100 | 51.33  | 20.67 | 24.00  | 0.33  | 3.67  | 48.67  | 1.42   |
| 155 | PP1505-63-2-4 | 5.33   | 5.33   | 100 | 53.33  | 19.33 | 25.33  | 1.00  | 1.00  | 46.67  | 0.22   |
| 156 | PP1505-63-2-5 | 6.33   | 6.67   | 100 | 33.50  | 24.00 | 37.50  | 1.00  | 4.00  | 66.50  | 1.89   |
| 158 | ICP 8863      | 5.00   | 5.67   | 100 | 58.00  | 21.00 | 18.33  | 0.33  | 2.33  | 42.00  | 0.33   |
| 163 | ICPL 87119    | 6.33   | 6.33   | 100 | 54.00  | 21.67 | 20.00  | 0.00  | 4.33  | 46.00  | 0.78   |
| 157 | ENT 11        | 6.33   | 5.33   | 100 | 49.67  | 18.67 | 29.00  | 1.67  | 1.00  | 50.33  | 0.89   |
| 159 | ICPL 332 WR   | 5.33   | 5.00   | 100 | 56.00  | 18.33 | 21.67  | 0.00  | 4.00  | 44.00  | 0.44   |
| 160 | ICP 7035      | 5.67   | 5.33   | 100 | 60.67  | 19.00 | 17.00  | 0.33  | 3.00  | 39.33  | 0.44   |
| 161 | ICPL 85010    | 7.33   | 7.67   | 100 | 48.00  | 21.00 | 28.67  | 0.00  | 2.33  | 52.00  | 0.89   |
| 162 | ICPL 87       | 7.33   | 7.67   | 100 | 29.67  | 34.33 | 35.33  | 0.00  | 0.67  | 70.33  | 2.44   |
| 164 | ICPL 88039    | 6.67   | 7.00   | 100 | 48.33  | 18.67 | 29.67  | 1.00  | 2.33  | 51.67  | 0.44   |
|     | <b>Fp</b>     | <0.001 | <0.001 |     | <0.001 | 0.113 | <0.001 | 0.010 | 0.192 | <0.001 | <0.001 |



|  |                     |       |       |  |       |       |       |        |        |       |        |
|--|---------------------|-------|-------|--|-------|-------|-------|--------|--------|-------|--------|
|  | <b>Vr</b>           | 1.63  | 2.47  |  | 1.78  | 1.18  | 1.72  | 1.36   | 1.12   | 1.78  | 2.13   |
|  | <b>SE±</b>          | 0.40  | 0.40  |  | 7.11  | 1.82  | 6.97  | 0.43   | 1.38   | 7.10  | 1.066  |
|  | <b>LSD (P 0.05)</b> | 1.10  | 1.00  |  | 19.77 | 5.06  | 19.39 | 1.20   | 3.85   | 19.77 | 0.3019 |
|  | <b>CV (%)</b>       | 11.20 | 10.40 |  | 25.70 | 15.10 | 42.30 | 216.10 | 101.30 | 23.60 | 0.8376 |

Note: Fp, *F* probability; Vr, variance; SE, standard error of the mean; LSD, least significant difference; CV, coefficient of variation.

**Supplementary Table S6.** Detached pod assay of the selected introgression lines for pod borer resistance under laboratory conditions during the 2019 rainy season at ICRISAT, Patancheru, India.

| S. No. | Genotype identity | Pod damage rating | Pre-larval weight (mg) | Post-larval weight (mg) | Larval weight gain (%) |
|--------|-------------------|-------------------|------------------------|-------------------------|------------------------|
| 1      | PP 1501 -14-5-3   | 5.00              | 13.2                   | 56.00                   | 333.10                 |
| 2      | PP1501-10-17-1    | 6.00              | 12.6                   | 80.93                   | 535.96                 |
| 3      | PP1501-10-17-2    | 4.33              | 15.1                   | 99.73                   | 559.65                 |
| 4      | PP1501-1-10-1     | 3.33              | 11.87                  | 34.87                   | 194.30                 |
| 5      | PP1501-1-10-4     | 6.00              | 10.63                  | 77.03                   | 620.53                 |
| 6      | PP1501-1-10-8     | 3.00              | 9.83                   | 14.23                   | 45.10                  |
| 7      | PP1501-1-12-3     | 5.67              | 13.03                  | 75.57                   | 490.75                 |
| 8      | PP1501-1-12-8     | 4.33              | 12.67                  | 73.37                   | 478.36                 |
| 9      | PP1501-1-13-2     | 5.33              | 11.7                   | 89.60                   | 646.29                 |
| 10     | PP1501-1-13-3     | 4.00              | 12.03                  | 82.73                   | 594.33                 |
| 11     | PP1501-1-13-4     | 3.33              | 11.17                  | 56.40                   | 438.56                 |
| 12     | PP1501-1-13-5     | 5.33              | 8.43                   | 110.00                  | 1203.33                |
| 13     | PP1501-1-18-4     | 4.67              | 11.27                  | 104.47                  | 836.93                 |
| 14     | PP1501-1-20-2     | 4.33              | 12.63                  | 46.47                   | 257.84                 |
| 15     | PP1501-1-20-6     | 5.33              | 12.1                   | 76.07                   | 517.11                 |
| 16     | PP1501-12-1-1     | 3.00              | 9.6                    | 30.70                   | 221.83                 |
| 17     | PP1501-12-1-2     | 4.33              | 7.87                   | 74.27                   | 838.18                 |
| 18     | PP1501-12-1-3     | 3.00              | 7.87                   | 15.57                   | 97.76                  |
| 19     | PP1501-12-1-4     | 4.00              | 9.63                   | 49.50                   | 429.31                 |
| 20     | PP1501-12-1-5     | 3.33              | 9.3                    | 61.57                   | 539.79                 |
| 21     | PP1501-12-1-6     | 3.67              | 7.6                    | 53.80                   | 609.88                 |
| 22     | PP1501-12-1-7     | 5.67              | 6.83                   | 71.37                   | 940.78                 |
| 23     | PP1501-1-2-2      | 3.33              | 7.57                   | 62.97                   | 751.46                 |
| 24     | PP1501-1-22-1     | 3.67              | 9.2                    | 51.27                   | 456.57                 |
| 25     | PP1501-1-22-2     | 3.33              | 6.93                   | 55.87                   | 700.67                 |
| 26     | PP1501-1-22-3     | 3.00              | 7.23                   | 32.60                   | 390.51                 |
| 27     | PP1501-1-22-4     | 4.00              | 6.67                   | 54.90                   | 724.93                 |
| 28     | PP1501-1-22-5     | 4.67              | 6.93                   | 53.43                   | 659.88                 |
| 29     | PP1501-1-23-2     | 3.00              | 5.2                    | 41.90                   | 708.07                 |
| 30     | PP1501-1-23-3     | 3.67              | 8.5                    | 64.17                   | 693.76                 |
| 31     | PP1501-1-2-4      | 3.67              | 9.87                   | 50.30                   | 403.98                 |
| 32     | PP1501-14-1-5     | 3.67              | 9.63                   | 51.03                   | 438.71                 |
| 33     | PP1501-14-2-1     | 4.33              | 7.77                   | 72.17                   | 802.12                 |
| 34     | PP1501-14-2-3     | 3.67              | 7.27                   | 20.03                   | 175.62                 |
| 35     | PP1501-14-4-3     | 4.33              | 7.7                    | 96.80                   | 1126.60                |
| 36     | PP1501-14-7-7     | 3.67              | 7.57                   | 37.63                   | 396.32                 |
| 37     | PP1501-1-5-2      | 3.33              | 10.03                  | 49.03                   | 414.93                 |
| 38     | PP1501-1-6-2      | 2.67              | 8.27                   | 14.87                   | 85.16                  |
| 39     | PP1501-16-6-5     | 3.33              | 7.97                   | 49.93                   | 525.54                 |

|    |               |      |       |       |        |
|----|---------------|------|-------|-------|--------|
| 40 | PP1501-16-7-2 | 3.00 | 6.93  | 43.37 | 542.43 |
| 41 | PP1501-16-7-6 | 3.00 | 7     | 53.73 | 736.85 |
| 42 | PP1501-16-7-7 | 4.33 | 10.3  | 63.17 | 512.23 |
| 43 | PP1501-1-8-2  | 2.67 | 9.73  | 60.27 | 502.50 |
| 44 | PP1501-20-6-2 | 3.33 | 6.87  | 38.53 | 421.58 |
| 45 | PP1501-2-13-2 | 2.33 | 5.27  | 18.40 | 251.43 |
| 46 | PP1501-2-16-4 | 4.00 | 5.37  | 49.80 | 814.88 |
| 47 | PP1501-2-2-5  | 4.67 | 11.33 | 65.33 | 462.67 |
| 48 | PP1501-2-3-6  | 4.33 | 8.17  | 67.03 | 720.14 |
| 49 | PP1501-2-4-1  | 3.00 | 9.07  | 46.40 | 405.56 |
| 50 | PP1501-2-5-1  | 5.67 | 8.83  | 66.13 | 650.16 |
| 51 | PP1501-2-6-2  | 4.00 | 7.37  | 55.43 | 651.78 |
| 52 | PP1501-2-9-4  | 3.67 | 8.5   | 50.77 | 513.96 |
| 53 | PP1501-3-11-2 | 5.33 | 8.67  | 66.77 | 663.24 |
| 54 | PP1501-3-15-1 | 4.67 | 9.17  | 65.70 | 628.01 |
| 55 | PP1501-3-17-3 | 2.67 | 7.87  | 52.97 | 577.79 |
| 56 | PP1501-4-12-1 | 3.33 | 7.27  | 51.77 | 623.54 |
| 57 | PP1501-4-12-2 | 3.00 | 7.5   | 29.03 | 289.57 |
| 58 | PP1501-4-12-4 | 4.33 | 6.57  | 40.13 | 485.35 |
| 59 | PP1501-4-12-5 | 3.33 | 6.5   | 52.87 | 710.85 |
| 60 | PP1501-4-14-3 | 4.67 | 8.97  | 52.83 | 488.22 |
| 61 | PP1501-4-14-4 | 3.67 | 7.87  | 13.00 | 65.54  |
| 62 | PP1501-4-17-1 | 3.00 | 7.4   | 31.40 | 327.66 |
| 63 | PP1501-4-17-2 | 3.00 | 7.37  | 47.20 | 522.19 |
| 64 | PP1501-4-17-3 | 4.67 | 7.2   | 63.83 | 786.72 |
| 65 | PP1501-4-17-7 | 3.33 | 6.57  | 29.37 | 359.15 |
| 66 | PP1501-4-20-1 | 4.00 | 5.93  | 34.07 | 496.44 |
| 67 | PP1501-4-21-6 | 2.33 | 6.17  | 48.90 | 706.50 |
| 68 | PP1501-4-8-2  | 2.67 | 5.67  | 37.10 | 550.77 |
| 69 | PP1501-4-9-2  | 2.67 | 6.73  | 45.73 | 588.33 |
| 70 | PP1501-4-9-3  | 3.33 | 6.13  | 60.33 | 878.26 |
| 71 | PP1501-5-14-1 | 3.67 | 6.7   | 12.60 | 88.70  |
| 72 | PP1501-5-14-3 | 3.00 | 6.3   | 14.83 | 137.28 |
| 73 | PP1501-5-14-4 | 3.00 | 5.93  | 11.73 | 96.72  |
| 74 | PP1501-5-15-3 | 3.33 | 6     | 37.90 | 530.26 |
| 75 | PP1501-5-15-7 | 5.00 | 5.4   | 35.00 | 552.91 |
| 76 | PP1501-6-12-2 | 6.50 | 13.3  | 88.00 | 559.21 |
| 77 | PP1501-7-19-5 | 4.50 | 5.7   | 46.45 | 716.79 |
| 78 | PP1501-9-18-1 | 5.00 | 12.7  | 38.80 | 206.46 |
| 79 | PP1501-9-9-2  | 6.50 | 13.75 | 70.47 | 406.50 |
| 80 | PP1503-10-5-4 | 7.00 | 16.15 | 67.60 | 318.31 |
| 81 | PP1503-10-5-6 | 6.50 | 12.85 | 30.03 | 151.90 |
| 82 | PP1503-11-1-1 | 6.50 | 13.35 | 83.85 | 511.79 |
| 83 | PP1503-11-1-4 | 5.50 | 16.6  | 45.47 | 172.24 |
| 84 | PP1503-12-1-7 | 5.00 | 17.1  | 41.80 | 149.23 |

|     |               |      |       |        |        |
|-----|---------------|------|-------|--------|--------|
| 85  | PP1503-12-2-2 | 4.50 | 10.3  | 34.52  | 237.53 |
| 86  | PP1503-12-2-6 | 6.00 | 17.35 | 88.65  | 410.57 |
| 87  | PP1503-14-2-7 | 6.50 | 7.5   | 58.35  | 405.48 |
| 88  | PP1503-15-1-2 | 6.00 | 15.2  | 51.10  | 238.14 |
| 89  | PP1503-15-1-7 | 5.50 | 11.95 | 47.40  | 293.83 |
| 90  | PP1503-15-2-2 | 5.00 | 14.35 | 26.68  | 85.88  |
| 91  | PP1503-15-3-3 | 6.50 | 16.8  | 72.70  | 329.80 |
| 92  | PP1503-15-3-4 | 6.50 | 14.9  | 83.30  | 458.30 |
| 93  | PP1503-16-3-8 | 6.50 | 12.9  | 73.00  | 459.66 |
| 94  | PP1503-18-1-7 | 6.50 | 16.55 | 76.30  | 352.60 |
| 95  | PP1503-20-1-2 | 7.50 | 6.73  | 70.95  | 299.71 |
| 96  | PP1503-20-1-5 | 7.50 | 17.15 | 97.95  | 470.71 |
| 97  | PP1503-20-1-7 | 7.00 | 15.15 | 51.15  | 241.46 |
| 98  | PP1503-22-1-5 | 7.50 | 11.95 | 76.70  | 544.70 |
| 99  | PP1503-22-3-1 | 6.50 | 10.85 | 43.40  | 302.94 |
| 100 | PP1503-22-3-3 | 7.00 | 15.05 | 55.60  | 277.04 |
| 101 | PP1503-22-4-5 | 4.00 | 12.63 | 19.43  | 52.38  |
| 102 | PP1503-25-4-4 | 5.50 | 10.85 | 44.80  | 323.61 |
| 103 | PP1503-25-5-2 | 5.00 | 13.15 | 59.10  | 349.15 |
| 104 | PP1503-25-5-6 | 6.00 | 13.85 | 35.30  | 145.24 |
| 105 | PP1503-26-3-5 | 7.00 | 13.85 | 87.55  | 540.57 |
| 106 | PP1503-27-2-8 | 6.00 | 12.8  | 43.95  | 219.93 |
| 107 | PP1503-27-4-4 | 6.00 | 19.25 | 81.55  | 320.24 |
| 108 | PP1503-28-1-3 | 6.50 | 19.55 | 75.40  | 283.51 |
| 109 | PP1503-29-1-5 | 7.00 | 14    | 67.80  | 381.40 |
| 110 | PP1503-29-2-1 | 5.50 | 13.2  | 44.80  | 239.38 |
| 111 | PP1503-29-2-7 | 8.00 | 15.7  | 84.00  | 437.00 |
| 112 | PP1503-30-1-6 | 7.50 | 17.75 | 66.45  | 273.97 |
| 113 | PP1503-3-1-3  | 3.00 | 9.75  | 11.38  | 16.76  |
| 114 | PP1503-5-2-4  | 6.00 | 16.15 | 69.95  | 330.38 |
| 115 | PP1503-5-3-1  | 5.50 | 12.3  | 94.15  | 660.28 |
| 116 | PP1503-5-3-3  | 4.50 | 12.9  | 40.67  | 213.06 |
| 117 | PP1503-6-1-4  | 5.00 | 14.8  | 38.87  | 163.51 |
| 118 | PP1503-6-2-5  | 5.50 | 10.45 | 35.07  | 232.30 |
| 119 | PP1503-8-2-4  | 5.00 | 12.95 | 60.05  | 354.88 |
| 120 | PP1503-8-3-2  | 7.00 | 17.55 | 59.65  | 242.75 |
| 121 | PP1504-1-3-1  | 2.33 | 13.2  | 14.43  | 114.88 |
| 122 | PP1504-2-11-5 | 2.67 | 18.5  | 13.57  | 69.73  |
| 123 | PP1504-2-1-3  | 4.33 | 14.65 | 57.03  | 658.40 |
| 124 | PP1504-2-2-1  | 5.67 | 18.7  | 70.00  | 690.50 |
| 125 | PP1504-3-7-2  | 4.67 | 14.3  | 24.57  | 208.95 |
| 126 | PP1504-4-8-2  | 5.00 | 17.85 | 38.43  | 451.60 |
| 127 | PP1504-4-9-1  | 4.00 | 22.3  | 71.10  | 792.73 |
| 128 | PP1504-4-9-2  | 4.00 | 20.8  | 18.30  | 103.41 |
| 129 | PP1505-11-2-2 | 7.00 | 16.45 | 153.93 | 844.50 |

|                          |                     |                  |                  |                  |                  |
|--------------------------|---------------------|------------------|------------------|------------------|------------------|
| 130                      | PP1505-11-2-4       | 6.50             | 20.75            | 125.10           | 501.93           |
| 131                      | PP1505-11-2-5       | 5.00             | 17.4             | 56.25            | 230.46           |
| 132                      | PP1505-11-2-6       | 6.00             | 18.25            | 79.72            | 330.03           |
| 133                      | PP1505-13-6-3       | 6.50             | 17.1             | 80.03            | 367.86           |
| 134                      | PP1505-20-5-2       | 6.50             | 21.35            | 92.55            | 344.69           |
| 135                      | PP1505-2-3-1        | 8.50             | 8.8              | 81.50            | 828.24           |
| 136                      | PP1505-2-8-1        | 7.50             | 20.35            | 113.80           | 459.44           |
| 137                      | PP1505-28-6-1       | 4.00             | 12.47            | 99.00            | 723.27           |
| 138                      | PP1505-29-4-1       | 5.67             | 13.47            | 89.27            | 536.10           |
| 139                      | PP1505-31-1-2       | 4.71             | 11.33            | 60.00            | 477.00           |
| 140                      | PP1505-32-3-2       | 4.33             | 11.57            | 102.30           | 816.44           |
| 141                      | PP1505-32-5-3       | 3.33             | 11.17            | 116.03           | 943.59           |
| 142                      | PP1505-34-3-6       | 4.00             | 7.5              | 44.20            | 349.21           |
| 143                      | PP1505-63-2-6       | 4.33             | 7                | 90.07            | 883.02           |
| 144                      | PP1505-36-4-1       | 4.33             | 7.93             | 52.60            | 340.40           |
| 145                      | PP1505-36-4-2       | 5.00             | 10.4             | 41.87            | 300.04           |
| 146                      | PP1505-36-4-4       | 4.67             | 10.07            | 113.13           | 1031.08          |
| 147                      | PP1505-4-4-1        | 3.67             | 10.3             | 77.07            | 660.47           |
| 148                      | PP1505-59-4-1       | 4.33             | 7.93             | 72.80            | 783.73           |
| 149                      | PP1505-59-4-3       | 6.50             | 10.30            | 73.33            | 352.83           |
| 150                      | PP1505-59-4-4       | 5.00             | 10.7             | 105.27           | 901.95           |
| 151                      | PP1505-59-4-6       | 3.00             | 7.9              | 60.83            | 661.00           |
| 152                      | PP1505-59-7-1       | 4.67             | 7.63             | 50.03            | 559.81           |
| 153                      | PP1505-59-7-2       | 6.50             | 10.30            | 79.47            | 459.30           |
| 154                      | PP1505-61-4-1       | 3.67             | 9.6              | 68.53            | 600.56           |
| 155                      | PP1505-63-2-4       | 6.00             | 7.77             | 87.20            | 1010.33          |
| 156                      | PP1505-63-2-5       | 4.00             | 9                | 85.17            | 884.10           |
| <b>Recurrent parents</b> |                     |                  |                  |                  |                  |
| 157                      | ICP 8863            | 5.00             | 11.37            | 85.93            | 653.56           |
| 158                      | ICPL 87119          | 3.33             | 13.73            | 65.33            | 370.82           |
| <b>Checks</b>            |                     |                  |                  |                  |                  |
| 159                      | ENT 11              | 5.67             | 13.17            | 93.17            | 628.48           |
| 160                      | ICPL 332 WR         | 5.67             | 11.90            | 113.63           | 853.99           |
| 161                      | ICPL 88039          | 4.33             | 12.97            | 75.60            | 490.47           |
| 162                      | ICP 7035            | 3.33             | 14.60            | 56.63            | 287.43           |
| 163                      | ICPL 85010          | 4.67             | 10.60            | 80.00            | 651.73           |
| 164                      | ICPL 87             | 3.00             | 13.03            | 64.40            | 420.32           |
|                          | <b>Fp</b>           | <b>&lt;0.001</b> | <b>&lt;0.001</b> | <b>&lt;0.001</b> | <b>&lt;0.001</b> |
|                          | <b>Mean</b>         | <b>4.70</b>      | <b>11.30</b>     | <b>60.00</b>     | <b>477.00</b>    |
|                          | <b>SE ±</b>         | <b>0.39</b>      | <b>0.95</b>      | <b>9.89</b>      | <b>88.02</b>     |
|                          | <b>LSD (P 0.05)</b> | <b>1.09</b>      | <b>2.65</b>      | <b>27.50</b>     | <b>244.89</b>    |
|                          | <b>CV (%)</b>       | <b>14.40</b>     | <b>14.60</b>     | <b>28.50</b>     | <b>32.00</b>     |

Note: Fp, *F* probability; Vr, variance; SE, standard error of the mean; LSD, least significant difference; CV, coefficient of variation.

**Supplementary Table S7.** Evaluation of introgression lines for pod borer damage and important agronomic traits during the 2019 rainy season at Warangal, India.

| S.No. | Line/Phenotype  | Days to first flowerin<br>g | Days to 50% flowerin<br>g | Days to maturity | Recovery resistance score | Total No. of pods per 5 plants | Pod borer damage per 5 plants (%) | Spotted borer damage per 5 plants (%) | Pod fly damage per 5 plants (%) | Pod wasp damage per 5 plants (%) | Plume moth damage per 5 plants (%) | Total pod borer complex damage (%) | Total healthy pods (%) |
|-------|-----------------|-----------------------------|---------------------------|------------------|---------------------------|--------------------------------|-----------------------------------|---------------------------------------|---------------------------------|----------------------------------|------------------------------------|------------------------------------|------------------------|
| 1     | ENT 11          | 100.7                       | 108.7                     | 154.7            | 5.7                       | 393.3                          | 8.1                               | 8.9                                   | 13.1                            | 0.0                              | 0.0                                | 30.1                               | 69.9                   |
| 2     | ICP 7035        | 101.3                       | 109.3                     | 153.3            | 6.0                       | 207.7                          | 7.4                               | 13.9                                  | 12.4                            | 0.0                              | 0.0                                | 33.7                               | 66.3                   |
| 3     | ICP 8863        | 97.0                        | 105.0                     | 145.0            | 8.0                       | 610.3                          | 9.9                               | 5.4                                   | 14.3                            | 0.0                              | 0.0                                | 29.5                               | 70.5                   |
| 4     | ICPL 332 WR     | 98.3                        | 106.3                     | 146.3            | 5.7                       | 777.7                          | 4.4                               | 12.1                                  | 21.1                            | 0.0                              | 0.0                                | 37.6                               | 62.4                   |
| 5     | ICPL 85010      | 76.3                        | 84.3                      | 128.3            | 4.7                       | 224.0                          | 14.7                              | 12.4                                  | 17.5                            | 0.0                              | 0.0                                | 44.7                               | 55.3                   |
| 6     | ICPL 87         | 72.7                        | 80.7                      | 122.0            | 7.3                       | 401.7                          | 17.6                              | 5.4                                   | 5.6                             | 0.0                              | 0.0                                | 28.7                               | 71.3                   |
| 7     | ICPL 87119      | 102.0                       | 110.0                     | 161.3            | 7.0                       | 843.3                          | 6.3                               | 9.0                                   | 19.0                            | 0.0                              | 0.0                                | 34.3                               | 65.7                   |
| 8     | ICPL 88039      | 79.7                        | 87.7                      | 127.7            | 6.7                       | 419.0                          | 20.0                              | 3.8                                   | 17.0                            | 0.0                              | 0.0                                | 40.8                               | 59.2                   |
| 9     | PP 1501 -14-5-3 | 96.7                        | 104.7                     | 146.3            | 7.0                       | 593.3                          | 11.8                              | 7.7                                   | 9.1                             | 0.0                              | 0.0                                | 28.6                               | 71.4                   |
| 10    | PP1501-1-10-1   | 101.3                       | 109.3                     | 151.3            | 7.0                       | 807.7                          | 16.2                              | 13.7                                  | 16.7                            | 0.0                              | 0.0                                | 46.6                               | 53.4                   |
| 11    | PP1501-1-10-4   | 116.0                       | 124.0                     | 166.0            | 6.3                       | 571.7                          | 5.0                               | 7.7                                   | 17.7                            | 0.0                              | 0.0                                | 30.4                               | 69.6                   |
| 12    | PP1501-1-10-8   | 107.0                       | 115.0                     | 158.3            | 6.0                       | 768.3                          | 10.4                              | 7.8                                   | 18.6                            | 0.0                              | 0.0                                | 36.8                               | 63.2                   |
| 13    | PP1501-1-12-3   | 99.0                        | 107.0                     | 151.0            | 6.7                       | 700.7                          | 4.9                               | 5.4                                   | 25.0                            | 0.0                              | 0.0                                | 35.4                               | 64.6                   |
| 14    | PP1501-1-12-8   | 97.7                        | 105.7                     | 147.0            | 7.0                       | 717.7                          | 17.0                              | 10.0                                  | 19.7                            | 0.0                              | 0.0                                | 46.7                               | 53.3                   |
| 15    | PP1501-1-13-2   | 108.0                       | 116.0                     | 156.0            | 7.0                       | 466.3                          | 8.5                               | 6.1                                   | 18.1                            | 0.0                              | 0.0                                | 32.8                               | 67.2                   |
| 16    | PP1501-1-13-3   | 104.3                       | 112.3                     | 153.3            | 6.0                       | 344.0                          | 10.6                              | 8.1                                   | 7.7                             | 0.0                              | 0.0                                | 26.4                               | 73.6                   |
| 17    | PP1501-1-13-4   | 98.0                        | 106.0                     | 144.0            | 7.0                       | 713.0                          | 8.8                               | 8.4                                   | 12.2                            | 0.0                              | 0.0                                | 29.4                               | 70.6                   |
| 18    | PP1501-1-13-5   | 85.7                        | 93.7                      | 134.7            | 7.0                       | 540.3                          | 16.0                              | 5.4                                   | 10.6                            | 0.0                              | 0.0                                | 32.0                               | 68.0                   |
| 19    | PP1501-1-18-4   | 105.7                       | 113.7                     | 156.0            | 7.0                       | 584.7                          | 5.8                               | 8.3                                   | 17.1                            | 0.0                              | 0.0                                | 31.2                               | 68.8                   |
| 20    | PP1501-1-2-2    | 97.3                        | 105.3                     | 146.7            | 7.0                       | 518.0                          | 12.9                              | 7.2                                   | 17.8                            | 0.0                              | 0.0                                | 37.8                               | 62.2                   |

|    |                |       |       |       |     |        |      |      |      |     |     |      |      |
|----|----------------|-------|-------|-------|-----|--------|------|------|------|-----|-----|------|------|
| 21 | PP1501-1-2-4   | 103.3 | 111.3 | 147.7 | 6.3 | 703.0  | 11.3 | 15.5 | 16.7 | 0.1 | 0.0 | 43.6 | 56.4 |
| 22 | PP1501-1-20-2  | 103.7 | 111.7 | 153.3 | 7.3 | 485.7  | 11.8 | 12.2 | 13.4 | 0.0 | 0.0 | 37.4 | 62.6 |
| 23 | PP1501-1-20-6  | 111.0 | 119.0 | 163.0 | 6.7 | 673.7  | 9.6  | 9.9  | 27.2 | 0.0 | 0.0 | 46.7 | 53.3 |
| 24 | PP1501-1-22-1  | 102.0 | 110.0 | 153.3 | 7.3 | 224.3  | 19.3 | 7.7  | 12.9 | 0.0 | 0.0 | 40.0 | 60.0 |
| 25 | PP1501-1-22-2  | 89.0  | 97.0  | 140.0 | 7.7 | 512.3  | 10.2 | 4.2  | 6.9  | 1.1 | 0.0 | 22.3 | 77.7 |
| 26 | PP1501-1-22-3  | 96.3  | 104.3 | 144.3 | 7.0 | 672.7  | 14.6 | 6.3  | 9.2  | 0.0 | 0.0 | 30.1 | 69.9 |
| 27 | PP1501-1-22-4  | 91.0  | 99.0  | 140.0 | 7.0 | 514.0  | 24.1 | 9.9  | 9.1  | 0.0 | 0.0 | 43.1 | 56.9 |
| 28 | PP1501-1-22-5  | 92.0  | 100.0 | 142.0 | 6.7 | 670.7  | 10.0 | 6.5  | 7.2  | 0.0 | 0.0 | 23.7 | 76.3 |
| 29 | PP1501-1-23-2  | 99.3  | 107.3 | 148.0 | 5.3 | 523.7  | 7.8  | 6.2  | 9.2  | 0.0 | 0.0 | 23.2 | 76.8 |
| 30 | PP1501-1-23-3  | 101.0 | 109.0 | 149.0 | 7.0 | 218.3  | 17.3 | 9.7  | 17.4 | 0.0 | 0.0 | 44.5 | 55.5 |
| 31 | PP1501-1-5-2   | 99.3  | 107.3 | 146.3 | 7.0 | 606.3  | 16.1 | 7.0  | 6.2  | 0.0 | 0.0 | 29.2 | 70.8 |
| 32 | PP1501-1-6-2   | 91.0  | 99.0  | 140.0 | 7.0 | 506.7  | 13.4 | 3.8  | 19.8 | 0.0 | 0.0 | 37.1 | 62.9 |
| 33 | PP1501-1-8-2   | 113.3 | 121.3 | 161.0 | 6.7 | 788.3  | 13.0 | 5.8  | 23.7 | 0.0 | 0.0 | 42.4 | 57.6 |
| 34 | PP1501-10-17-1 | 98.0  | 106.0 | 151.3 | 7.0 | 328.0  | 11.2 | 12.6 | 16.5 | 0.0 | 0.0 | 40.3 | 59.7 |
| 35 | PP1501-10-17-2 | 95.7  | 103.7 | 144.7 | 7.0 | 318.3  | 22.8 | 7.1  | 24.5 | 0.0 | 0.0 | 54.3 | 45.7 |
| 36 | PP1501-12-1-1  | 126.0 | 134.0 | 176.7 | 5.7 | 691.7  | 12.4 | 13.1 | 7.8  | 0.0 | 0.0 | 33.3 | 66.7 |
| 37 | PP1501-12-1-2  | 126.3 | 134.3 | 179.7 | 7.3 | 446.0  | 7.5  | 2.4  | 21.8 | 0.0 | 0.0 | 31.7 | 68.3 |
| 38 | PP1501-12-1-3  | 115.0 | 123.0 | 164.7 | 6.3 | 700.3  | 8.3  | 7.4  | 17.8 | 0.0 | 0.0 | 33.4 | 66.6 |
| 39 | PP1501-12-1-4  | 108.7 | 116.7 | 159.3 | 5.3 | 799.7  | 13.6 | 17.1 | 14.3 | 0.0 | 0.0 | 45.0 | 55.0 |
| 40 | PP1501-12-1-5  | 109.7 | 117.7 | 157.0 | 5.3 | 1140.7 | 10.6 | 15.8 | 8.7  | 0.0 | 0.0 | 35.1 | 64.9 |
| 41 | PP1501-12-1-6  | 127.7 | 135.7 | 176.3 | 6.0 | 1042.7 | 9.3  | 4.7  | 11.8 | 0.0 | 0.0 | 25.8 | 74.2 |
| 42 | PP1501-12-1-7  | 121.3 | 129.3 | 171.7 | 6.3 | 769.0  | 11.9 | 10.7 | 17.6 | 0.0 | 0.0 | 40.3 | 59.7 |
| 43 | PP1501-14-1-5  | 107.7 | 115.7 | 158.0 | 7.0 | 584.7  | 7.5  | 14.6 | 5.8  | 0.0 | 0.0 | 27.9 | 72.1 |
| 44 | PP1501-14-2-1  | 125.3 | 133.3 | 177.7 | 5.7 | 733.3  | 7.0  | 6.9  | 19.8 | 0.0 | 0.0 | 33.7 | 66.3 |
| 45 | PP1501-14-2-3  | 110.7 | 118.7 | 161.3 | 6.3 | 764.7  | 7.6  | 7.1  | 9.6  | 0.0 | 0.0 | 24.3 | 75.7 |
| 46 | PP1501-14-4-3  | 99.7  | 107.7 | 150.0 | 6.3 | 675.0  | 14.7 | 11.2 | 16.3 | 0.0 | 0.0 | 42.1 | 57.9 |
| 47 | PP1501-14-7-7  | 123.3 | 131.3 | 172.0 | 6.7 | 751.3  | 10.4 | 10.1 | 13.1 | 0.0 | 0.0 | 33.6 | 66.4 |
| 48 | PP1501-16-6-5  | 121.7 | 129.7 | 170.3 | 6.0 | 566.0  | 12.7 | 13.7 | 16.3 | 0.0 | 0.0 | 42.7 | 57.3 |
| 49 | PP1501-16-7-2  | 131.0 | 139.0 | 180.3 | 6.3 | 693.3  | 3.8  | 8.0  | 8.4  | 0.0 | 0.0 | 20.2 | 79.8 |

|    |               |       |       |       |      |       |      |      |      |     |     |      |      |
|----|---------------|-------|-------|-------|------|-------|------|------|------|-----|-----|------|------|
| 50 | PP1501-16-7-6 | 128.0 | 136.0 | 178.3 | 4.3  | 585.0 | 7.0  | 10.4 | 8.6  | 0.0 | 0.0 | 26.0 | 74.0 |
| 51 | PP1501-16-7-7 | 124.3 | 132.3 | 173.3 | 6.3  | 632.3 | 7.0  | 6.4  | 12.3 | 0.0 | 0.0 | 25.7 | 74.3 |
| 52 | PP1501-2-13-2 | 100.0 | 108.0 | 148.0 | 7.3  | 643.7 | 6.8  | 5.7  | 14.3 | 0.0 | 0.0 | 26.8 | 73.2 |
| 53 | PP1501-2-16-4 | 112.0 | 120.0 | 160.7 | 6.7  | 796.0 | 8.3  | 3.3  | 4.1  | 0.0 | 0.0 | 15.7 | 84.3 |
| 54 | PP1501-2-3-6  | 90.7  | 98.7  | 141.0 | 6.3  | 505.7 | 20.6 | 8.2  | 9.4  | 0.0 | 0.0 | 38.3 | 61.7 |
| 55 | PP1501-2-4-1  | 102.0 | 110.0 | 150.0 | 6,33 | 672.7 | 14.4 | 10.9 | 10.4 | 0.0 | 0.0 | 35.7 | 64.3 |
| 56 | PP1501-2-5-1  | 101.0 | 109.0 | 154.3 | 6.7  | 546.3 | 6.7  | 4.1  | 9.6  | 0.0 | 0.0 | 20.4 | 79.6 |
| 57 | PP1501-2-6-2  | 96.7  | 104.7 | 146.7 | 7.7  | 438.7 | 9.8  | 8.6  | 16.7 | 0.0 | 0.0 | 35.0 | 65.0 |
| 58 | PP1501-2-9-4  | 108.7 | 116.7 | 161.3 | 7.0  | 496.3 | 17.6 | 7.4  | 5.5  | 0.0 | 0.0 | 30.4 | 69.6 |
| 59 | PP1501-20-6-2 | 122.0 | 130.0 | 172.7 | 6.3  | 383.0 | 9.8  | 9.7  | 32.1 | 0.0 | 0.0 | 51.6 | 48.4 |
| 60 | PP1501-3-11-2 | 100.0 | 108.0 | 150.0 | 7.0  | 419.0 | 12.1 | 6.2  | 6.3  | 0.0 | 0.0 | 24.6 | 75.4 |
| 61 | PP1501-3-15-1 | 113.3 | 121.3 | 166.3 | 7.0  | 873.0 | 15.7 | 10.9 | 20.2 | 0.0 | 0.0 | 46.8 | 53.2 |
| 62 | PP1501-3-17-3 | 103.0 | 111.0 | 154.0 | 7.3  | 529.0 | 10.4 | 6.3  | 19.9 | 0.0 | 0.0 | 36.6 | 63.4 |
| 63 | PP1501-4-12-1 | 84.0  | 92.0  | 141.3 | 6.7  | 460.0 | 8.4  | 7.2  | 10.0 | 0.0 | 0.0 | 25.5 | 74.5 |
| 64 | PP1501-4-12-2 | 96.0  | 104.0 | 144.0 | 6.3  | 657.3 | 22.0 | 6.0  | 6.1  | 0.0 | 0.0 | 34.1 | 65.9 |
| 65 | PP1501-4-12-4 | 88.0  | 96.0  | 142.0 | 7.0  | 471.0 | 17.6 | 12.2 | 11.5 | 0.0 | 0.0 | 41.3 | 58.7 |
| 66 | PP1501-4-12-5 | 100.0 | 108.0 | 151.0 | 7.7  | 537.0 | 16.5 | 10.7 | 7.6  | 0.0 | 0.0 | 34.8 | 65.2 |
| 67 | PP1501-4-14-3 | 100.0 | 108.0 | 150.0 | 7.0  | 360.0 | 13.2 | 9.0  | 12.8 | 0.3 | 0.0 | 35.2 | 64.8 |
| 68 | PP1501-4-14-4 | 108.3 | 116.3 | 146.7 | 6.3  | 498.3 | 11.9 | 5.2  | 22.5 | 0.0 | 0.0 | 39.6 | 60.4 |
| 69 | PP1501-4-17-1 | 126.3 | 134.3 | 173.3 | 7.0  | 414.3 | 6.3  | 9.4  | 27.3 | 0.0 | 0.0 | 42.9 | 57.1 |
| 70 | PP1501-4-17-2 | 111.0 | 119.0 | 163.3 | 7.0  | 995.7 | 16.5 | 9.1  | 9.5  | 0.0 | 0.0 | 35.2 | 64.8 |
| 71 | PP1501-4-17-3 | 98.3  | 106.3 | 148.7 | 4.3  | 562.3 | 6.5  | 7.0  | 11.1 | 0.0 | 0.0 | 24.6 | 75.4 |
| 72 | PP1501-4-17-7 | 89.7  | 97.7  | 141.0 | 5.7  | 500.3 | 15.1 | 11.0 | 9.7  | 0.0 | 0.0 | 35.9 | 64.1 |
| 73 | PP1501-4-20-1 | 104.0 | 112.0 | 152.7 | 7.3  | 431.7 | 7.6  | 11.3 | 13.8 | 0.0 | 0.0 | 32.7 | 67.3 |
| 74 | PP1501-4-21-6 | 106.7 | 114.7 | 155.3 | 4.7  | 772.3 | 7.6  | 6.4  | 10.0 | 0.0 | 0.0 | 24.0 | 76.0 |
| 75 | PP1501-4-8-2  | 107.3 | 115.3 | 156.0 | 6.0  | 554.3 | 11.9 | 10.3 | 11.6 | 0.0 | 0.0 | 33.8 | 66.2 |
| 76 | PP1501-4-9-2  | 106.0 | 114.0 | 156.0 | 6.3  | 589.7 | 9.9  | 10.8 | 8.3  | 0.0 | 0.0 | 29.0 | 71.0 |
| 77 | PP1501-4-9-3  | 102.7 | 110.7 | 154.0 | 7.3  | 664.7 | 20.7 | 6.2  | 6.7  | 0.0 | 0.0 | 33.5 | 66.5 |
| 78 | PP1501-5-14-1 | 107.0 | 115.0 | 156.0 | 7.0  | 518.7 | 9.9  | 3.5  | 10.5 | 0.0 | 0.0 | 24.0 | 76.0 |



|     |               |       |       |       |     |        |      |      |      |     |     |      |      |
|-----|---------------|-------|-------|-------|-----|--------|------|------|------|-----|-----|------|------|
| 79  | PP1501-5-14-3 | 110.3 | 118.3 | 158.0 | 7.0 | 821.0  | 16.0 | 8.9  | 18.8 | 0.0 | 0.0 | 43.7 | 56.3 |
| 80  | PP1501-5-14-4 | 118.3 | 126.3 | 168.0 | 5.7 | 721.0  | 9.5  | 9.4  | 24.3 | 0.0 | 0.0 | 43.3 | 56.7 |
| 81  | PP1501-5-15-3 | 101.7 | 109.7 | 149.0 | 6.7 | 795.7  | 10.3 | 11.8 | 20.2 | 0.0 | 0.0 | 42.3 | 57.7 |
| 82  | PP1501-5-15-7 | 110.0 | 118.0 | 160.0 | 7.3 | 637.7  | 10.4 | 10.3 | 9.2  | 0.0 | 0.0 | 30.0 | 70.0 |
| 83  | PP1501-6-12-2 | 90.0  | 98.0  | 141.0 | 7.0 | 517.7  | 17.3 | 10.1 | 10.2 | 0.0 | 0.0 | 37.5 | 62.5 |
| 84  | PP1501-7-19-5 | 96.3  | 104.3 | 144.0 | 7.3 | 789.7  | 12.3 | 7.0  | 17.5 | 0.0 | 0.0 | 36.8 | 63.2 |
| 85  | PP1501-9-18-1 | 102.0 | 110.0 | 152.0 | 6.3 | 775.0  | 5.0  | 8.3  | 28.3 | 0.0 | 0.0 | 41.5 | 58.5 |
| 86  | PP1501-9-9-2  | 113.3 | 121.3 | 162.0 | 6.3 | 579.3  | 14.7 | 8.8  | 19.0 | 0.0 | 0.0 | 42.4 | 57.6 |
| 87  | PP1503-10-5-4 | 125.7 | 133.7 | 177.7 | 6.0 | 1019.7 | 10.0 | 13.1 | 18.1 | 0.0 | 0.0 | 41.3 | 58.7 |
| 88  | PP1503-10-5-6 | 121.3 | 129.3 | 174.0 | 6.0 | 654.7  | 15.9 | 10.2 | 11.6 | 0.0 | 0.0 | 37.7 | 62.3 |
| 89  | PP1503-12-1-7 | 114.3 | 122.3 | 164.3 | 6.7 | 565.0  | 12.3 | 15.6 | 19.7 | 0.0 | 0.0 | 47.6 | 52.4 |
| 90  | PP1503-12-2-2 | 128.3 | 136.3 | 178.7 | 6.3 | 804.7  | 10.4 | 7.7  | 14.5 | 0.0 | 0.0 | 32.6 | 67.4 |
| 91  | PP1503-12-2-6 | 103.0 | 111.0 | 152.0 | 6.7 | 1064.3 | 14.0 | 8.1  | 9.7  | 0.0 | 0.0 | 31.8 | 68.2 |
| 92  | PP1503-14-2-7 | 126.7 | 134.7 | 176.3 | 6.7 | 793.7  | 6.3  | 7.4  | 21.2 | 0.0 | 0.0 | 34.9 | 65.1 |
| 93  | PP1503-15-1-2 | 107.0 | 115.0 | 159.3 | 4.7 | 617.3  | 16.2 | 7.8  | 10.8 | 0.0 | 0.0 | 34.7 | 65.3 |
| 94  | PP1503-15-1-7 | 117.0 | 125.0 | 164.0 | 6.3 | 985.0  | 6.8  | 4.0  | 2.8  | 0.0 | 0.0 | 13.7 | 86.3 |
| 95  | PP1503-15-2-2 | 124.0 | 132.0 | 173.3 | 7.3 | 807.3  | 20.2 | 15.1 | 22.7 | 0.0 | 0.0 | 58.0 | 42.0 |
| 96  | PP1503-15-3-3 | 103.7 | 111.7 | 153.3 | 6.3 | 750.3  | 18.1 | 21.7 | 13.3 | 0.0 | 0.0 | 53.1 | 46.9 |
| 97  | PP1503-15-3-4 | 99.0  | 107.0 | 151.0 | 6.7 | 786.3  | 7.2  | 10.0 | 11.4 | 0.0 | 0.0 | 28.6 | 71.4 |
| 98  | PP1503-16-3-8 | 100.3 | 108.3 | 149.7 | 6.7 | 449.3  | 11.9 | 6.4  | 16.5 | 0.0 | 0.0 | 34.9 | 65.1 |
| 99  | PP1503-20-1-2 | 108.0 | 116.0 | 160.0 | 6.7 | 729.7  | 12.0 | 11.6 | 16.0 | 0.0 | 0.0 | 39.6 | 60.4 |
| 100 | PP1503-20-1-5 | 106.0 | 114.0 | 156.3 | 5.7 | 807.3  | 13.4 | 16.3 | 11.8 | 0.0 | 0.0 | 41.5 | 58.5 |
| 101 | PP1503-20-1-7 | 105.7 | 113.7 | 152.7 | 7.0 | 737.3  | 10.0 | 8.7  | 9.5  | 0.0 | 0.0 | 28.2 | 71.8 |
| 102 | PP1503-22-1-5 | 101.7 | 109.7 | 158.0 | 7.7 | 624.0  | 5.8  | 13.3 | 19.8 | 0.0 | 0.0 | 38.9 | 61.1 |
| 103 | PP1503-22-3-3 | 120.3 | 128.3 | 169.0 | 6.7 | 688.3  | 9.5  | 9.0  | 17.2 | 0.0 | 0.0 | 35.7 | 64.3 |
| 104 | PP1503-22-4-5 | 120.0 | 128.0 | 170.0 | 5.7 | 906.7  | 15.5 | 12.7 | 14.3 | 0.0 | 0.0 | 42.4 | 57.6 |
| 105 | PP1503-25-4-4 | 108.0 | 116.0 | 159.3 | 5.0 | 841.0  | 15.8 | 15.4 | 13.5 | 0.0 | 0.0 | 44.7 | 55.3 |
| 106 | PP1503-25-5-2 | 117.7 | 125.7 | 170.0 | 6.7 | 761.3  | 10.3 | 6.0  | 12.8 | 0.0 | 0.0 | 29.1 | 70.9 |
| 107 | PP1503-26-3-5 | 96.0  | 104.0 | 144.0 | 6.0 | 770.7  | 4.1  | 4.2  | 19.2 | 0.0 | 0.0 | 27.5 | 72.5 |

|     |               |       |       |       |     |        |      |      |      |     |     |      |      |
|-----|---------------|-------|-------|-------|-----|--------|------|------|------|-----|-----|------|------|
| 108 | PP1503-27-2-8 | 102.3 | 110.3 | 152.7 | 5.7 | 739.3  | 6.0  | 8.6  | 18.7 | 0.0 | 0.0 | 33.3 | 66.7 |
| 109 | PP1503-27-4-4 | 108.7 | 116.7 | 164.7 | 5.7 | 1168.3 | 12.5 | 8.0  | 14.8 | 0.0 | 0.0 | 35.3 | 64.7 |
| 110 | PP1503-28-1-3 | 105.7 | 113.7 | 157.7 | 6.3 | 1007.0 | 12.9 | 13.6 | 11.2 | 0.0 | 0.0 | 37.8 | 62.2 |
| 111 | PP1503-29-1-5 | 116.7 | 124.7 | 168.0 | 6.7 | 702.0  | 24.8 | 12.0 | 8.7  | 0.0 | 0.0 | 45.5 | 54.5 |
| 112 | PP1503-29-2-7 | 125.7 | 133.7 | 176.3 | 6.7 | 1245.3 | 9.1  | 3.8  | 21.6 | 0.0 | 0.0 | 34.5 | 65.5 |
| 113 | PP1503-30-1-6 | 120.0 | 128.0 | 170.0 | 6.7 | 1016.0 | 6.1  | 4.7  | 12.4 | 0.0 | 0.0 | 23.1 | 76.9 |
| 114 | PP1503-5-2-4  | 100.7 | 108.7 | 150.0 | 6.3 | 776.3  | 13.2 | 6.5  | 16.6 | 0.0 | 0.0 | 36.3 | 63.7 |
| 115 | PP1503-5-3-1  | 122.3 | 130.3 | 172.0 | 6.7 | 503.0  | 12.3 | 10.0 | 21.4 | 0.0 | 0.0 | 43.8 | 56.2 |
| 116 | PP1503-5-3-3  | 111.0 | 119.0 | 159.3 | 6.0 | 528.0  | 12.5 | 10.8 | 23.3 | 0.0 | 0.0 | 46.7 | 53.3 |
| 117 | PP1503-6-1-4  | 128.7 | 136.7 | 174.0 | 6.7 | 776.0  | 5.2  | 8.4  | 17.9 | 0.0 | 0.0 | 31.5 | 68.5 |
| 118 | PP1503-6-2-5  | 104.7 | 112.7 | 156.0 | 6.0 | 727.3  | 15.6 | 12.9 | 15.8 | 0.0 | 0.0 | 44.3 | 55.7 |
| 119 | PP1503-8-2-4  | 120.7 | 128.7 | 170.7 | 4.3 | 404.3  | 10.1 | 8.3  | 6.6  | 0.0 | 0.0 | 25.0 | 75.0 |
| 120 | PP1503-8-3-2  | 102.7 | 110.7 | 148.0 | 6.3 | 884.0  | 11.7 | 8.5  | 13.1 | 0.0 | 0.0 | 33.3 | 66.7 |
| 121 | PP1504-1-3-1  | 98.7  | 106.7 | 145.3 | 5.0 | 942.3  | 12.7 | 6.3  | 14.9 | 0.0 | 0.0 | 33.9 | 66.1 |
| 122 | PP1504-2-2-1  | 108.3 | 116.3 | 157.3 | 7.0 | 654.3  | 8.0  | 7.7  | 23.9 | 0.0 | 0.0 | 39.6 | 60.4 |
| 123 | PP1505-11-2-2 | 125.0 | 133.0 | 176.3 | 7.0 | 281.7  | 6.5  | 11.2 | 5.8  | 0.0 | 0.0 | 23.5 | 76.5 |
| 124 | PP1505-11-2-4 | 109.0 | 117.0 | 157.0 | 7.0 | 805.0  | 14.7 | 9.9  | 6.5  | 0.0 | 0.0 | 31.1 | 68.9 |
| 125 | PP1505-11-2-5 | 101.0 | 109.0 | 150.3 | 7.0 | 495.3  | 11.8 | 10.1 | 11.0 | 0.0 | 0.0 | 32.9 | 67.1 |
| 126 | PP1505-11-2-6 | 102.7 | 110.7 | 152.7 | 6.7 | 531.7  | 6.2  | 8.7  | 11.4 | 0.0 | 0.0 | 26.3 | 73.7 |
| 127 | PP1505-13-6-3 | 101.3 | 109.3 | 152.3 | 6.7 | 446.3  | 14.1 | 8.2  | 6.9  | 0.0 | 0.0 | 29.1 | 70.9 |
| 128 | PP1505-2-3-1  | 109.3 | 117.3 | 160.7 | 7.0 | 724.3  | 12.1 | 12.5 | 12.5 | 0.0 | 0.0 | 37.1 | 62.9 |
| 129 | PP1505-2-8-1  | 88.7  | 96.7  | 140.3 | 6.7 | 820.7  | 6.5  | 2.9  | 18.4 | 0.0 | 0.0 | 27.8 | 72.2 |
| 130 | PP1505-20-5-2 | 117.0 | 125.0 | 173.3 | 7.0 | 573.0  | 11.8 | 13.5 | 12.6 | 0.0 | 0.0 | 37.8 | 62.2 |
| 131 | PP1505-28-6-1 | 99.7  | 107.7 | 149.0 | 6.7 | 226.7  | 7.2  | 6.5  | 16.5 | 0.0 | 0.0 | 30.2 | 69.8 |
| 132 | PP1505-32-3-2 | 100.0 | 108.0 | 148.3 | 5.7 | 1066.3 | 13.6 | 8.2  | 16.9 | 0.0 | 0.0 | 38.7 | 61.3 |
| 133 | PP1505-32-5-3 | 107.0 | 115.0 | 156.7 | 7.3 | 324.3  | 8.9  | 7.9  | 9.3  | 0.0 | 0.0 | 26.1 | 73.9 |
| 134 | PP1505-34-3-6 | 127.3 | 135.3 | 180.3 | 6.3 | 560.0  | 16.1 | 11.9 | 14.1 | 0.0 | 0.0 | 42.1 | 57.9 |
| 135 | PP1505-36-4-1 | 131.3 | 139.3 | 180.3 | 6.0 | 397.3  | 8.8  | 11.4 | 13.0 | 0.0 | 0.0 | 33.2 | 66.8 |
| 136 | PP1505-36-4-2 | 108.3 | 116.3 | 161.0 | 6.0 | 1095.0 | 6.4  | 8.9  | 11.7 | 0.0 | 0.0 | 26.9 | 73.1 |

|     |                     |                  |                  |                  |               |               |                  |              |              |               |             |              |              |
|-----|---------------------|------------------|------------------|------------------|---------------|---------------|------------------|--------------|--------------|---------------|-------------|--------------|--------------|
| 137 | PP1505-36-4-4       | 111.0            | 119.0            | 160.7            | 4.7           | 744.0         | 12.5             | 6.2          | 8.0          | 0.0           | 0.0         | 26.7         | 73.3         |
| 138 | PP1505-4-4-1        | 100.7            | 108.7            | 146.0            | 6.3           | 587.7         | 9.8              | 28.8         | 11.6         | 0.7           | 0.0         | 50.9         | 49.1         |
| 139 | PP1505-59-4-1       | 128.3            | 136.3            | 181.0            | 5.3           | 1091.3        | 5.3              | 5.3          | 11.8         | 0.0           | 0.0         | 22.4         | 77.6         |
| 140 | PP1505-59-4-3       | 131.3            | 139.3            | 180.0            | 5.0           | 1038.7        | 12.2             | 8.6          | 12.1         | 0.0           | 0.0         | 32.9         | 67.1         |
| 141 | PP1505-59-4-4       | 119.7            | 127.7            | 170.0            | 7.0           | 871.7         | 6.3              | 11.5         | 19.5         | 0.0           | 0.0         | 37.3         | 62.7         |
| 142 | PP1505-59-4-6       | 104.0            | 112.0            | 152.0            | 6.0           | 959.3         | 6.5              | 5.8          | 21.7         | 0.0           | 0.0         | 34.0         | 66.0         |
| 143 | PP1505-59-7-1       | 121.0            | 129.0            | 172.7            | 7.0           | 790.3         | 10.1             | 8.4          | 5.2          | 0.0           | 0.0         | 23.7         | 76.3         |
| 144 | PP1505-59-7-2       | 118.0            | 126.0            | 169.7            | 6.7           | 590.0         | 13.1             | 15.1         | 23.6         | 0.0           | 0.0         | 51.8         | 48.2         |
|     |                     |                  |                  |                  |               |               |                  |              |              |               |             |              |              |
|     | <b>Fp</b>           | <b>&lt;0.001</b> | <b>&lt;0.001</b> | <b>&lt;0.001</b> | <b>0.106</b>  | <b>0.003</b>  | <b>&lt;0.001</b> | <b>0.346</b> | <b>0.088</b> | <b>0.528</b>  | <b>*</b>    | <b>0.015</b> | <b>0.015</b> |
|     | <b>Vr</b>           | <b>139.17</b>    | <b>139.17</b>    | <b>112.99</b>    | <b>1.19</b>   | <b>1.47</b>   | <b>1.71</b>      | <b>1.06</b>  | <b>1.21</b>  | <b>0.99</b>   | <b>*</b>    | <b>1.36</b>  | <b>1.36</b>  |
|     | <b>Mean</b>         | <b>107.33</b>    | <b>115.33</b>    | <b>157.33</b>    | <b>6.47</b>   | <b>658.00</b> | <b>11.45</b>     | <b>9.15</b>  | <b>14.25</b> | <b>0.02</b>   | <b>0.00</b> | <b>34.87</b> | <b>65.13</b> |
|     | <b>SE ±</b>         | <b>1.02</b>      | <b>1.02</b>      | <b>1.16</b>      | <b>0.6735</b> | <b>174.60</b> | <b>3.36</b>      | <b>3.59</b>  | <b>5.17</b>  | <b>0.11</b>   | <b>0.00</b> | <b>6.87</b>  | <b>6.87</b>  |
|     | <b>LSD (P 0.05)</b> | <b>2.83</b>      | <b>2.83</b>      | <b>3.22</b>      | <b>1.8747</b> | <b>486.00</b> | <b>9.36</b>      | <b>10.01</b> | <b>14.40</b> | <b>0.30</b>   | <b>*</b>    | <b>19.13</b> | <b>19.13</b> |
|     | <b>CV (%)</b>       | <b>1.60</b>      | <b>1.50</b>      | <b>1.30</b>      | <b>18</b>     | <b>46.00</b>  | <b>50.80</b>     | <b>68.00</b> | <b>62.90</b> | <b>125.20</b> | <b>0.00</b> | <b>34.10</b> | <b>18.30</b> |

Note: Fp, *F* probability; Vr, variance; SE, standard error of the mean; LSD, least significant difference; CV, coefficient of variation.

**Supplementary Table S8.** Trichome density (mm<sup>2</sup>) in the 39 most promising pod borer resistant introgression lines, as well as parents and checks, during the 2020 rainy season at ICRISAT, Patancheru, India.

| S.No. | Genotype       | Trichome density (mm <sup>2</sup> ) on adaxial leaf surface |        |        |        | Trichome density (mm <sup>2</sup> ) on abaxial leaf surface |        |        |        |
|-------|----------------|-------------------------------------------------------------|--------|--------|--------|-------------------------------------------------------------|--------|--------|--------|
|       |                | Type A                                                      | Type B | Type C | Type D | Type A                                                      | Type B | Type C | Type D |
| 1     | ENT 11         | 1.00                                                        | 34.33  | 23.67  | 3.33   | 3.00                                                        | 16.33  | 36.00  | 6.00   |
| 2     | ICP 8863       | 0.67                                                        | 16.00  | 35.00  | 3.67   | 0.00                                                        | 12.67  | 50.33  | 7.67   |
| 3     | ICPL 332 WR    | 2.33                                                        | 29.67  | 33.00  | 2.33   | 1.33                                                        | 17.67  | 51.67  | 4.67   |
| 4     | ICP 7035       | 1.00                                                        | 30.00  | 29.00  | 3.00   | 0.00                                                        | 11.67  | 58.33  | 6.67   |
| 5     | ICPL 85010     | 0.33                                                        | 20.33  | 18.00  | 2.33   | 1.67                                                        | 16.67  | 26.67  | 4.33   |
| 6     | ICPL 87        | 0.67                                                        | 30.00  | 14.67  | 1.67   | 0.00                                                        | 14.33  | 46.00  | 5.33   |
| 7     | ICPL 87119     | 1.33                                                        | 57.67  | 14.67  | 3.33   | 2.33                                                        | 27.00  | 49.67  | 5.33   |
| 8     | ICPL 88039     | 1.67                                                        | 24.33  | 22.33  | 3.33   | 2.00                                                        | 10.33  | 51.33  | 8.00   |
| 9     | PP1501-1-10-1  | 1.33                                                        | 33.67  | 9.67   | 1.33   | 2.33                                                        | 17.00  | 27.33  | 4.33   |
| 10    | PP1501-1-10-8  | 0.33                                                        | 18.33  | 44.33  | 5.00   | 0.00                                                        | 12.67  | 45.33  | 6.00   |
| 11    | PP1501-1-13-5  | 0.33                                                        | 24.00  | 27.00  | 2.67   | 2.00                                                        | 25.67  | 53.33  | 6.67   |
| 12    | PP1501-1-18-4  | 2.67                                                        | 39.33  | 23.00  | 3.67   | 5.00                                                        | 18.67  | 41.67  | 6.00   |
| 13    | PP1501-1-22-3  | 1.67                                                        | 17.33  | 31.67  | 3.33   | 1.00                                                        | 14.00  | 62.67  | 4.33   |
| 14    | PP1501-1-23-2  | 0.67                                                        | 25.67  | 17.33  | 2.67   | 1.00                                                        | 18.00  | 36.00  | 7.33   |
| 15    | PP1501-1-23-3  | 0.33                                                        | 31.00  | 22.67  | 2.67   | 2.00                                                        | 11.00  | 39.67  | 4.67   |
| 16    | PP1501-1-6-2   | 1.00                                                        | 28.67  | 36.00  | 3.00   | 1.33                                                        | 14.67  | 46.33  | 6.33   |
| 17    | PP1501-10-17-2 | 0.67                                                        | 29.33  | 28.00  | 4.00   | 3.00                                                        | 15.33  | 58.67  | 6.33   |
| 18    | PP1501-12-1-2  | 2.33                                                        | 32.67  | 27.33  | 2.33   | 2.67                                                        | 20.00  | 32.33  | 4.00   |
| 19    | PP1501-12-1-5  | 1.00                                                        | 40.00  | 30.67  | 2.67   | 3.33                                                        | 18.00  | 56.00  | 9.00   |
| 20    | PP1501-12-1-6  | 0.67                                                        | 35.67  | 28.33  | 4.00   | 1.33                                                        | 16.67  | 55.00  | 3.67   |
| 21    | PP1501-14-1-5  | 0.00                                                        | 39.33  | 30.67  | 3.00   | 1.33                                                        | 12.67  | 60.33  | 6.33   |
| 22    | PP1501-14-7-7  | 2.00                                                        | 46.33  | 10.33  | 3.33   | 1.33                                                        | 25.67  | 48.00  | 8.00   |
| 23    | PP1501-16-7-2  | 0.33                                                        | 28.67  | 37.67  | 5.67   | 1.67                                                        | 19.33  | 53.67  | 8.67   |
| 24    | PP1501-2-3-6   | 1.00                                                        | 28.67  | 32.33  | 3.33   | 2.00                                                        | 19.33  | 48.00  | 5.33   |
| 25    | PP1501-2-9-4   | 0.67                                                        | 21.00  | 18.67  | 3.33   | 1.67                                                        | 19.67  | 62.33  | 4.33   |
| 26    | PP1501-20-6-2  | 0.00                                                        | 24.67  | 46.67  | 4.67   | 1.33                                                        | 26.00  | 62.67  | 5.33   |
| 27    | PP1501-3-17-3  | 2.00                                                        | 33.67  | 30.33  | 1.67   | 1.00                                                        | 16.00  | 44.33  | 6.33   |
| 28    | PP1501-4-17-3  | 1.33                                                        | 28.67  | 15.67  | 1.00   | 0.00                                                        | 12.67  | 32.33  | 4.67   |
| 29    | PP1501-4-17-7  | 2.33                                                        | 20.33  | 18.00  | 2.00   | 2.67                                                        | 13.33  | 36.00  | 4.00   |
| 30    | PP1501-4-21-6  | 0.67                                                        | 26.67  | 28.67  | 3.67   | 1.33                                                        | 13.33  | 47.00  | 6.00   |
| 31    | PP1503-20-1-7  | 1.33                                                        | 20.00  | 45.67  | 5.33   | 1.00                                                        | 13.67  | 64.33  | 12.33  |
| 32    | PP1503-25-5-2  | 0.00                                                        | 32.00  | 28.33  | 4.00   | 2.67                                                        | 16.33  | 67.33  | 7.67   |
| 33    | PP1503-5-2-4   | 1.67                                                        | 49.67  | 35.00  | 3.00   | 1.00                                                        | 19.00  | 58.33  | 5.33   |
| 34    | PP1503-5-3-1   | 1.33                                                        | 34.00  | 27.67  | 3.00   | 1.00                                                        | 24.00  | 53.00  | 9.33   |
| 35    | PP1503-5-3-3   | 0.33                                                        | 46.00  | 38.67  | 2.33   | 5.00                                                        | 26.67  | 51.67  | 6.00   |
| 36    | PP1503-6-1-4   | 0.00                                                        | 25.33  | 36.00  | 4.00   | 0.67                                                        | 10.33  | 52.33  | 9.67   |
| 37    | PP1505-11-2-4  | 1.33                                                        | 15.33  | 24.00  | 3.00   | 1.33                                                        | 13.67  | 48.33  | 5.67   |
| 38    | PP1505-11-2-5  | 2.33                                                        | 24.00  | 25.33  | 5.67   | 1.67                                                        | 18.00  | 59.33  | 7.33   |
| 39    | PP1505-11-2-6  | 0.67                                                        | 22.00  | 39.67  | 5.67   | 0.33                                                        | 23.33  | 54.67  | 5.33   |
| 40    | PP1505-13-6-3  | 0.00                                                        | 31.33  | 18.67  | 3.00   | 1.67                                                        | 17.33  | 34.67  | 4.33   |
| 41    | PP1505-2-8-1   | 1.67                                                        | 38.67  | 33.00  | 5.00   | 2.00                                                        | 24.33  | 49.00  | 5.00   |
| 42    | PP1505-20-5-2  | 1.33                                                        | 23.33  | 29.00  | 2.67   | 0.67                                                        | 13.00  | 39.00  | 8.67   |
| 43    | PP1505-28-6-1  | 1.33                                                        | 31.33  | 8.33   | 2.33   | 1.00                                                        | 16.67  | 36.67  | 3.33   |

|    |                       |        |       |       |       |        |       |       |       |
|----|-----------------------|--------|-------|-------|-------|--------|-------|-------|-------|
| 44 | PP1505-34-3-6         | 0.33   | 31.67 | 18.00 | 2.33  | 2.00   | 12.00 | 46.67 | 6.00  |
| 45 | PP1505-36-4-1         | 1.00   | 29.00 | 37.67 | 1.67  | 1.00   | 16.33 | 58.33 | 7.33  |
| 46 | PP1505-36-4-2         | 0.33   | 20.67 | 23.00 | 2.33  | 0.33   | 11.67 | 44.33 | 7.33  |
| 47 | PP1505-63-2-4         | 0.00   | 23.00 | 39.33 | 3.67  | 0.33   | 6.00  | 57.00 | 11.67 |
|    | Fp                    | 0.897  | 0.340 | 0.513 | 0.904 | 0.798  | 0.790 | 0.175 | 0.608 |
|    | Vr                    | 0.71   | 1.10  | 0.98  | 0.71  | 0.80   | 0.80  | 1.26  | 0.93  |
|    | Mean                  | 1.01   | 29.60 | 27.50 | 3.21  | 1.56   | 16.78 | 48.80 | 6.34  |
|    | SE $\pm$              | 0.87   | 8.47  | 9.51  | 1.35  | 1.26   | 5.45  | 9.01  | 2.06  |
|    | LSD ( $P \leq 0.05$ ) | 2.45   | 23.80 | 26.71 | 3.78  | 3.54   | 15.29 | 25.31 | 5.78  |
|    | CV (%)                | 150.20 | 49.50 | 59.90 | 72.50 | 139.70 | 56.20 | 32.00 | 56.20 |

Note: Fp, *F* probability; Vr, variance; SE, standard error of the mean; LSD, least significant difference; CV, coefficient of variation
